# Supplementary material for: Metabolomic markers of glucose regulation after a lifestyle intervention in prediabetes
Source: PubMed Central journal article supplement — BMJ Open Diabetes Res Care. 2022 Oct 17;10(5):e003010. doi: 10.1136/bmjdrc-2022-003010 (PMC9577902; doi:10.1136/bmjdrc-2022-003010), 2022-10-17
Supplement: bmjdrc-2022-003010supp001.pdf [file bmjdrc-2022-003010supp001.pdf]

**Supplementary figure 1.** Flow chart of participants' selection process. T2D: Type 2 diabetes

**Supplementary figure 2.** Changes in protein consumption across visits

**Supplementary figure 3.** Heatmap of Metabolites selected by LASSO at least 10 times for their association with regression to normoglycemia (RGNG).

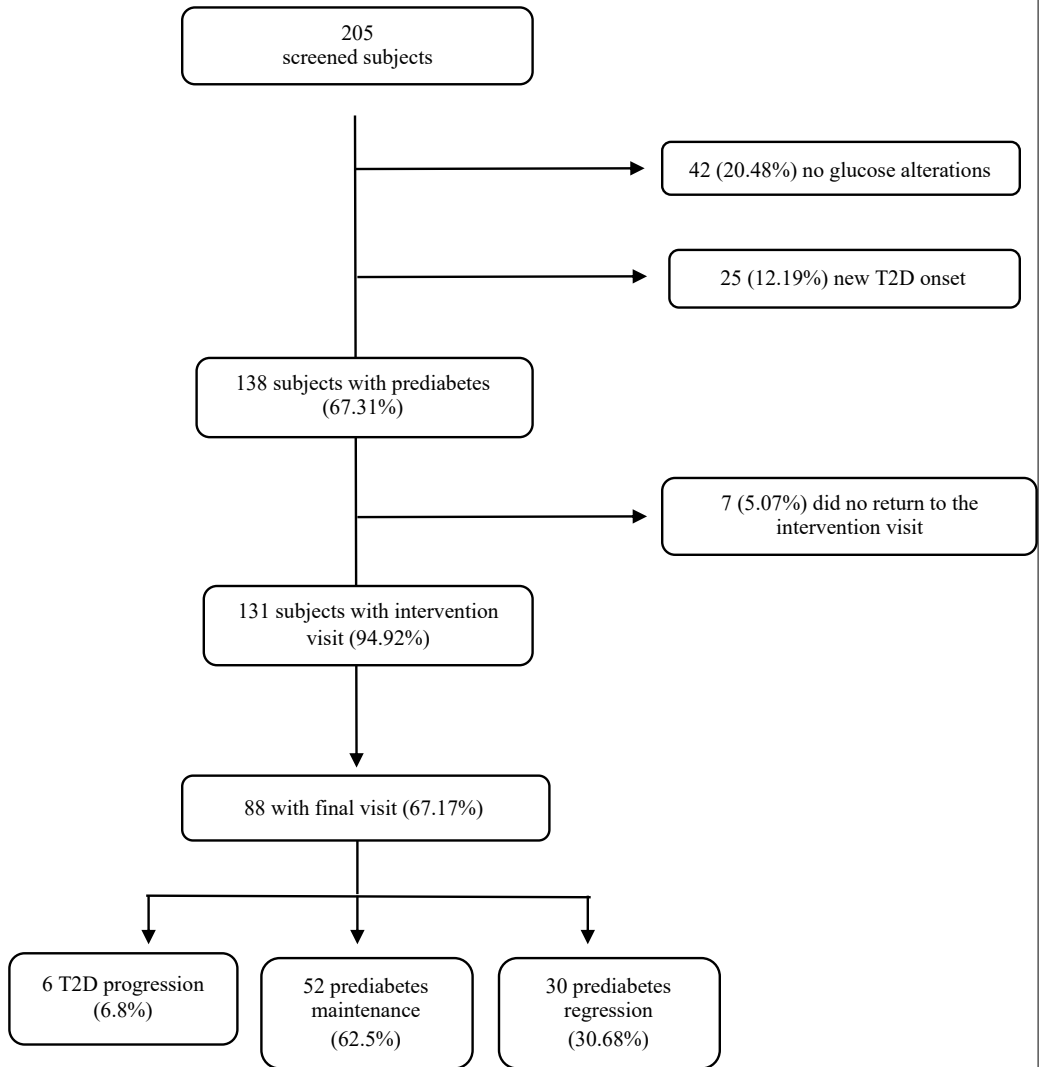

# Protein consumption across visits

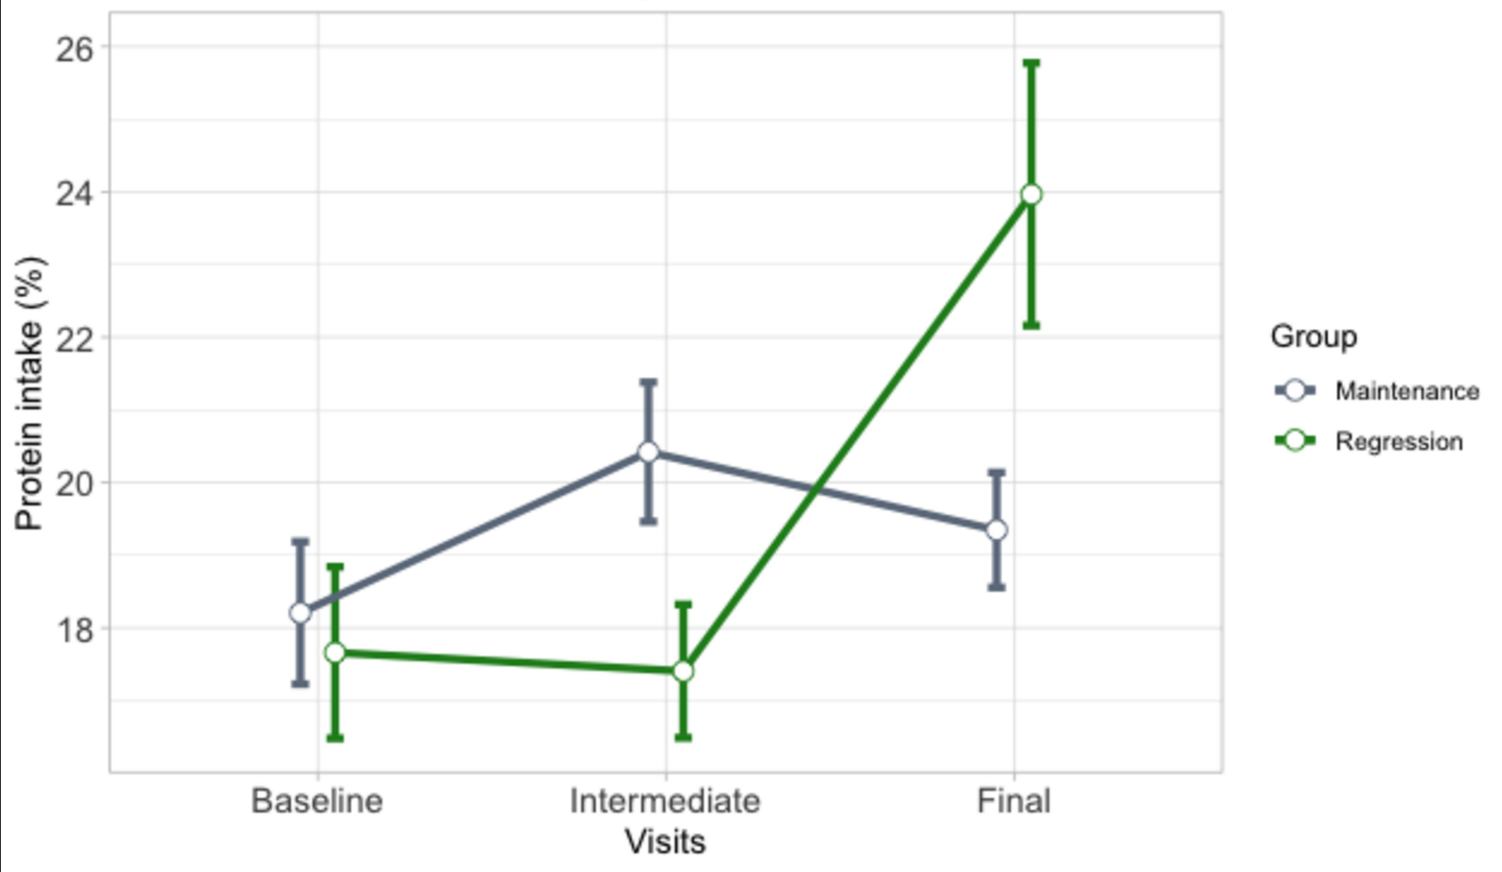

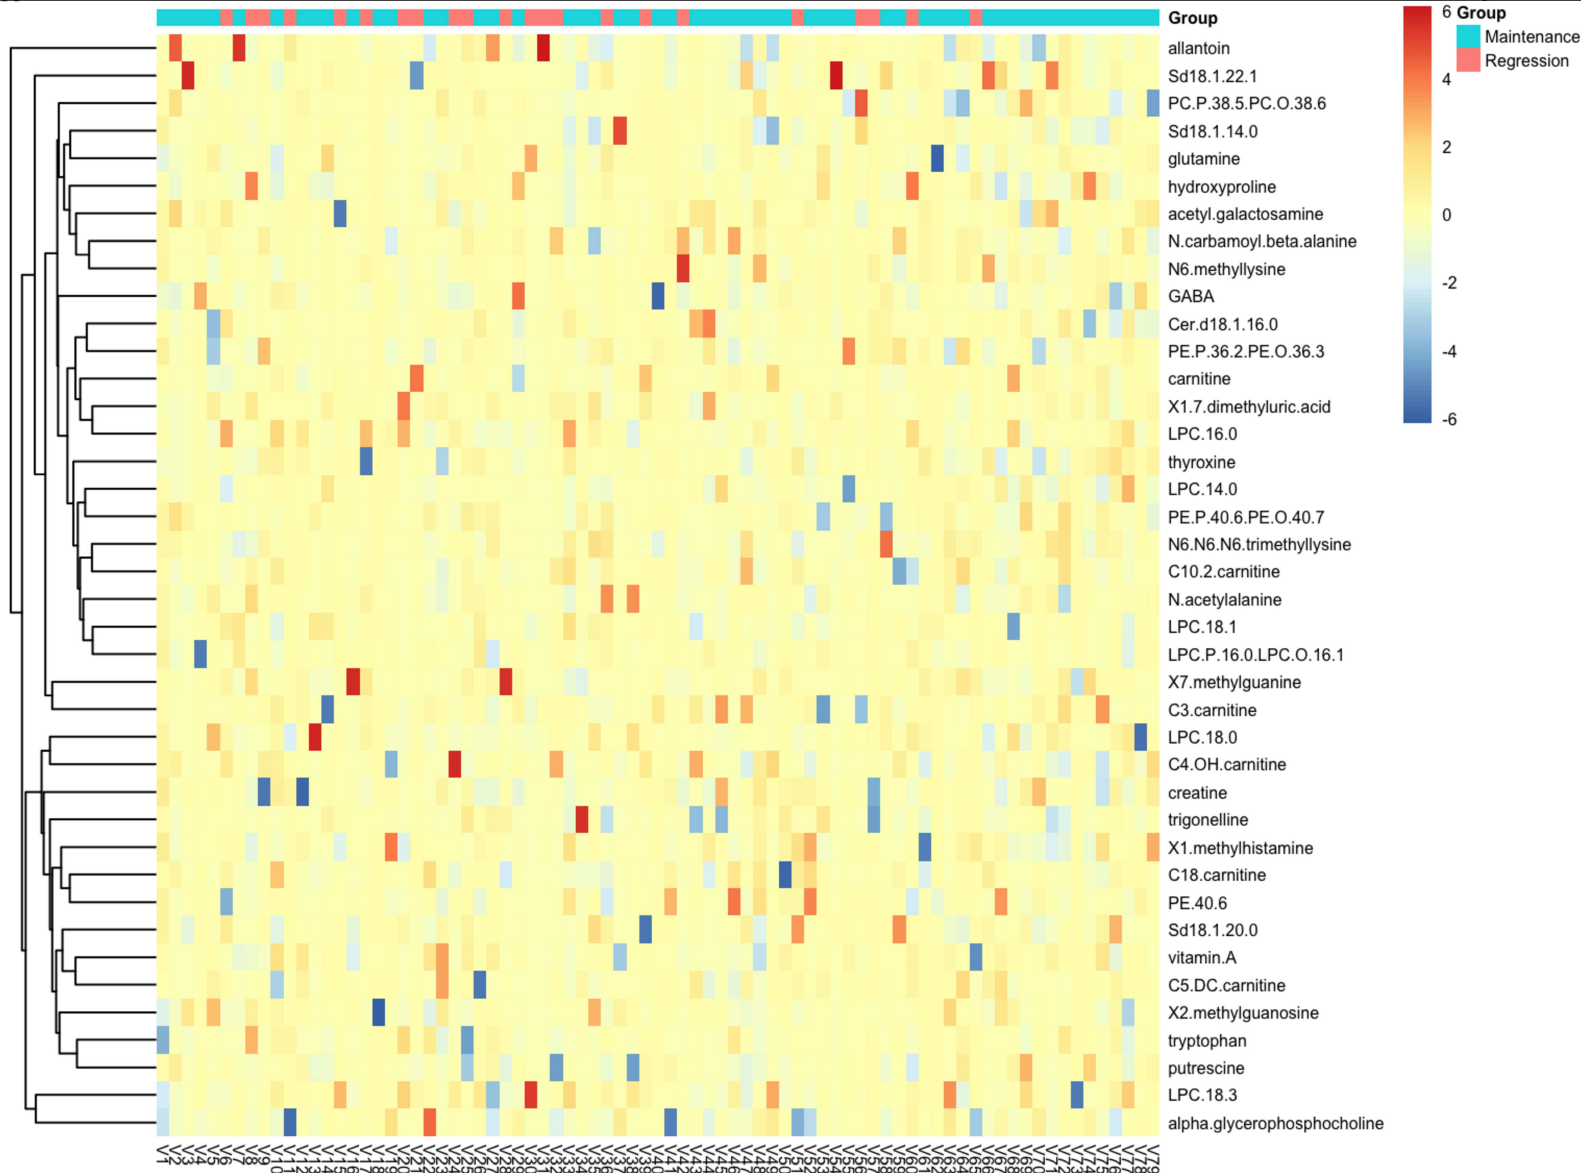

Supplementary table 1. Metabolites panel studied

|    | Method    | Compound ID | MZ       | RT    | HMDB_ID          | Metabolite                           |
|----|-----------|-------------|----------|-------|------------------|--------------------------------------|
| 1  | HILIC-pos | QI7675      | 174.1363 | 6.85  | internalstandard | phenylalanine_d8                     |
| 2  | HILIC-pos | QI4035      | 126.1367 | 7.54  | internalstandard | valine_d8                            |
| 3  | HILIC-pos | QI2153      | 197.0669 | 3.75  | HMDB0011103      | 1,7-dimethyluric_acid                |
| 6  | HILIC-pos | QI4213      | 282.1193 | 7.82  | HMDB0003331      | 1_methyladenosine                    |
| 7  | HILIC-pos | QI2873      | 166.0722 | 5.33  | HMDB0003282      | 1_methylguanine                      |
| 8  | HILIC-pos | QI8555      | 298.1143 | 5.21  | HMDB0001563      | 1_methylguanosine                    |
| 9  | HILIC-pos | QI6451      | 126.1027 | 9.89  | HMDB0000898      | 1_methylhistamine                    |
| 11 | HILIC-pos | QI6850      | 137.0708 | 8.37  | HMDB0000699      | 1_methylnicotinamide                 |
| 14 | HILIC-pos | QI7706      | 146.1174 | 6.8   | HMDB0094649      | 2-aminoheptanoic_acid                |
| 15 | HILIC-pos | TF1         | 104.0706 | 7.87  | HMDB0001906      | 2-aminoisobutyric_acid               |
| 16 | HILIC-pos | QI7791      | 160.1331 | 6.55  | HMDB0000991      | 2-aminooctanoate                     |
| 20 | HILIC-pos | QI9472      | 196.0605 | 2.71  | HMDB0000840      | 2-hydroxyhippurate                   |
| 23 | HILIC-pos | TF2         | 298.1146 | 5.38  | HMDB0005862      | 2_methylguanosine                    |
| 30 | HILIC-pos | QI6419      | 170.0923 | 10.03 | HMDB0000479      | 3_methylhistidine                    |
| 31 | HILIC-pos | QI9271      | 167.0562 | 3.44  | HMDB0001886      | 3_methylxanthine                     |
| 34 | HILIC-pos | QI9260      | 146.081  | 3.53  | HMDB0003681      | 4-acetamidobutanoate                 |
| 35 | HILIC-pos | QI1685      | 195.0765 | 2.44  | HMDB0001867      | 4-aminohippuric_acid                 |
| 37 | HILIC-pos | QI7403      | 146.0921 | 7.45  | HMDB0003464      | 4-guanidinobutanoic_acid             |
| 42 | HILIC-pos | QI8464      | 199.0825 | 5.39  | HMDB0004400      | 5-acetylamino_6-amino_3-methyluracil |
| 47 | HILIC-pos | QI7918      | 221.092  | 6.31  | HMDB0000472      | 5-hydroxytryptophan                  |
| 52 | HILIC-pos | QI3176      | 258.1083 | 5.83  | HMDB0000982      | 5-methylcytidine                     |
| 58 | HILIC-pos | QI8170      | 166.0722 | 5.89  | HMDB0000897      | 7_methylguanine                      |
| 59 | HILIC-pos | QI2180      | 167.0562 | 3.81  | HMDB0001991      | 7_methylxanthine                     |
| 62 | HILIC-pos | TF3         | 328.1027 | 5.49  | HMDB0010316      | acetaminophen_glucuronide            |

|     |           |         |          |      |                 |                                 |
|-----|-----------|---------|----------|------|-----------------|---------------------------------|
| 63  | HILIC-pos | QI7126  | 146.1173 | 7.88 | HMDB000089<br>5 | acetylcholine                   |
| 65  | HILIC-pos | QI8342  | 222.0971 | 5.59 | HMDB000021<br>2 | acetyl_galactos<br>amine        |
| 69  | HILIC-pos | QI8264  | 185.1284 | 5.72 | HMDB000158<br>4 | acisoga                         |
| 70  | HILIC-pos | QI8587  | 268.1039 | 5.15 | HMDB000005<br>0 | adenosine                       |
| 74  | HILIC-pos | TF4     | 203.1502 | 9.92 | HMDB000155<br>0 | ADMA                            |
| 78  | HILIC-pos | QI7103  | 90.055   | 7.94 | HMDB000016<br>1 | alanine                         |
| 79  | HILIC-pos | QI9228  | 159.0511 | 3.72 | HMDB000040<br>7 | allantoin                       |
| 84  | HILIC-pos | QI5100  | 258.1099 | 10.7 | HMDB000008<br>6 | alpha_glycerop<br>hosphocholine |
| 93  | HILIC-pos | QI4787  | 175.1188 | 9.33 | HMDB000051<br>7 | arginine                        |
| 95  | HILIC-pos | QI7015  | 133.0608 | 8.05 | HMDB000010<br>8 | asparagine                      |
| 101 | HILIC-pos | QI6640  | 118.0864 | 9.11 | HMDB000004<br>2 | betaine                         |
| 102 | HILIC-pos | QI10871 | 585.2705 | 1.74 | HMDB000005<br>4 | bilirubin                       |
| 103 | HILIC-pos | QI10050 | 583.255  | 2.05 | HMDB000100<br>8 | biliverdin                      |
| 106 | HILIC-pos | QI6671  | 146.1174 | 8.91 | HMDB000590<br>0 | butyrobetaine                   |
| 110 | HILIC-pos | QI1984  | 195.0877 | 2.96 | HMDB000184<br>7 | caffeine                        |
| 113 | HILIC-pos | QI6661  | 162.1122 | 8.98 | HMDB000006<br>2 | carnitine                       |
| 114 | HILIC-pos | QI6707  | 204.1228 | 8.8  | HMDB000020<br>1 | C2_carnitine                    |
| 115 | HILIC-pos | QI6841  | 218.1385 | 8.44 | HMDB000082<br>4 | C3_carnitine                    |
| 117 | HILIC-pos | QI4626  | 262.1283 | 8.69 | HMDB001313<br>3 | C3_DC_CH3_c<br>arnitine         |
| 118 | HILIC-pos | QI4407  | 232.1542 | 8.12 | HMDB000201<br>3 | C4_carnitine                    |
| 119 | HILIC-pos | QI6664  | 248.149  | 8.96 | HMDB001312<br>7 | C4_OH_carniti<br>ne             |
| 120 | HILIC-pos | QI4248  | 246.1698 | 7.88 | HMDB000068<br>8 | C5_carnitine                    |
| 121 | HILIC-pos | QI4299  | 244.1541 | 7.98 | HMDB000250<br>6 | C5_1_carnitine                  |
| 122 | HILIC-pos | QI4544  | 276.1439 | 8.46 | HMDB001313<br>0 | C5_DC_carniti<br>ne             |
| 123 | HILIC-pos | QI7270  | 260.1854 | 7.66 | HMDB000070<br>5 | C6_carnitine                    |
| 124 | HILIC-pos | QI4020  | 274.201  | 7.53 | HMDB001525<br>8 | C7_carnitine                    |
| 125 | HILIC-pos | QI7402  | 288.2166 | 7.45 | HMDB000079<br>1 | C8_carnitine                    |
| 126 | HILIC-pos | QI3884  | 302.2322 | 7.31 | HMDB001528<br>8 | C9_carnitine                    |
| 127 | HILIC-pos | QI7513  | 316.2478 | 7.24 | HMDB000065<br>1 | C10_carnitine                   |
| 128 | HILIC-pos | QI7464  | 312.2165 | 7.36 | HMDB001332<br>5 | C10_2_carnitin<br>e             |
| 129 | HILIC-pos | QI7580  | 344.2791 | 7.05 | HMDB000225<br>0 | C12_carnitine                   |
| 130 | HILIC-pos | QI3802  | 342.2634 | 7.08 | HMDB001332<br>6 | C12_1_carnitin<br>e             |
| 131 | HILIC-pos | QI3736  | 372.3103 | 6.91 | HMDB000506<br>6 | C14_carnitine                   |
| 132 | HILIC-pos | QI7638  | 370.2947 | 6.91 | HMDB000201<br>4 | C14_1_carnitin<br>e             |
| 133 | HILIC-pos | QI7611  | 368.2791 | 6.97 | HMDB001333<br>1 | C14_2_carnitin<br>e             |

|     |           |        |          |       |                 |                                                |
|-----|-----------|--------|----------|-------|-----------------|------------------------------------------------|
| 134 | HILIC-pos | QI7716 | 400.3417 | 6.79  | HMDB000022<br>2 | C16_carnitine                                  |
| 136 | HILIC-pos | QI3625 | 428.3729 | 6.68  | HMDB000084<br>8 | C18_carnitine                                  |
| 137 | HILIC-pos | QI3631 | 426.3573 | 6.7   | HMDB000506<br>5 | C18_1_carnitine                                |
| 139 | HILIC-pos | QI3646 | 424.3417 | 6.77  | HMDB000646<br>9 | C18_2_carnitine                                |
| 141 | HILIC-pos | QI3616 | 448.3417 | 6.65  | HMDB000645<br>5 | C20_4_carnitine                                |
| 142 | HILIC-pos | QI3493 | 540.4989 | 6.37  | HMDB000634<br>7 | C26_carnitine                                  |
| 150 | HILIC-pos | QI4527 | 104.1069 | 8.4   | HMDB000009<br>7 | choline                                        |
| 152 | HILIC-pos | QI9486 | 206.0812 | 2.68  | HMDB001162<br>1 | cinnamoylglycine                               |
| 153 | HILIC-pos | QI6816 | 176.1029 | 8.49  | HMDB000090<br>4 | citrulline                                     |
| 154 | HILIC-pos | QI1496 | 363.2162 | 2.07  | HMDB000006<br>3 | cortisol                                       |
| 155 | HILIC-pos | QI1454 | 361.2006 | 2.06  | HMDB000280<br>2 | cortisone                                      |
| 156 | HILIC-pos | QI2788 | 177.1021 | 5.16  | HMDB000104<br>6 | cotinine                                       |
| 158 | HILIC-pos | QI6837 | 132.0768 | 8.45  | HMDB000006<br>4 | creatine                                       |
| 159 | HILIC-pos | QI7777 | 114.0663 | 6.6   | HMDB000036<br>2 | creatinine                                     |
| 160 | HILIC-pos | QI3576 | 100.1121 | 6.54  | HMDB003140<br>4 | cyclohexylamine                                |
| 163 | HILIC-pos | QI4749 | 241.0309 | 9.19  | HMDB000019<br>2 | cystine                                        |
| 165 | HILIC-pos | QI3462 | 112.0506 | 6.32  | HMDB000063<br>0 | cytosine                                       |
| 170 | HILIC-pos | QI6291 | 287.2439 | 10.56 | HMDB000217<br>2 | diacetylspermine                               |
| 173 | HILIC-pos | QI4617 | 104.0706 | 8.67  | HMDB000009<br>2 | dimethylglycine                                |
| 174 | HILIC-pos | TF6    | 202.1186 | 8.1   | HMDB024021<br>2 | DMGV                                           |
| 180 | HILIC-pos | QI6645 | 143.0813 | 9.06  | NA              | ectoine                                        |
| 182 | HILIC-pos | TF7    | 104.0706 | 7.76  | HMDB000011<br>2 | GABA                                           |
| 183 | HILIC-pos | QI3821 | 172.133  | 7.16  | HMDB000030<br>5 | gabapentin                                     |
| 186 | HILIC-pos | QI7201 | 148.0602 | 7.74  | HMDB000014<br>8 | glutamate                                      |
| 187 | HILIC-pos | QI4433 | 147.0762 | 8.17  | HMDB000064<br>1 | glutamine                                      |
| 190 | HILIC-pos | QI4363 | 76.0393  | 8.06  | HMDB000012<br>2 | glycine                                        |
| 191 | HILIC-pos | QI8458 | 466.3161 | 5.39  | HMDB000013<br>8 | glycocholate                                   |
| 193 | HILIC-pos | QI2279 | 450.3211 | 4.23  | HMDB000063<br>1 | glycodeoxycholate_glycocholate<br>deoxycholate |
| 196 | HILIC-pos | QI4308 | 118.0613 | 7.99  | HMDB000012<br>8 | guanidinoacetic<br>_acid                       |
| 203 | HILIC-pos | QI1880 | 180.0654 | 2.66  | HMDB000071<br>4 | hippurate                                      |
| 206 | HILIC-pos | QI6530 | 156.0767 | 9.54  | HMDB000017<br>7 | histidine                                      |
| 208 | HILIC-pos | QI4797 | 189.1345 | 9.36  | HMDB000067<br>0 | homoarginine                                   |
| 209 | HILIC-pos | QI6818 | 190.1185 | 8.47  | HMDB000067<br>0 | homocitrulline                                 |
| 210 | HILIC-pos | QI3895 | 136.0424 | 7.33  | HMDB000074<br>2 | homocysteine                                   |

|     |           |         |          |       |             |                                    |
|-----|-----------|---------|----------|-------|-------------|------------------------------------|
| 212 | HILIC-pos | QI2758  | 193.0972 | 5.1   | HMDB0001390 | hydroxycotinine                    |
| 214 | HILIC-pos | QI4324  | 132.0656 | 8.01  | HMDB0000725 | hydroxyproline                     |
| 215 | HILIC-pos | TF8     | 110.027  | 8.13  | HMDB0000965 | hypotaurine                        |
| 222 | HILIC-pos | QI8657  | 269.0878 | 5.02  | HMDB0000195 | inosine                            |
| 224 | HILIC-pos | TF9     | 132.1019 | 7.21  | HMDB0000172 | isoleucine                         |
| 227 | HILIC-pos | QI8481  | 190.0498 | 5.35  | HMDB0000715 | kynurenic_acid                     |
| 230 | HILIC-pos | TF10    | 132.1019 | 7.08  | HMDB0000687 | leucine                            |
| 233 | HILIC-pos | QI10093 | 324.2894 | 2.05  | HMDB0012252 | linoleoyl_ethanolamide             |
| 235 | HILIC-pos | QI4851  | 147.1126 | 9.56  | HMDB0000182 | lysine                             |
| 239 | HILIC-pos | QI3819  | 150.0582 | 7.16  | HMDB0000696 | methionine                         |
| 240 | HILIC-pos | QI6717  | 166.0532 | 8.78  | HMDB0002005 | methionine_sulfoxide               |
| 243 | HILIC-pos | QI6655  | 141.0657 | 9.01  | HMDB0002820 | methylimidazoleacetic_acid         |
| 251 | HILIC-pos | QI10914 | 227.2005 | 1.72  | HMDB0002000 | myristoleic_acid                   |
| 252 | HILIC-pos | QI6423  | 188.1757 | 10.01 | HMDB0001276 | N1_acetylspermidine                |
| 254 | HILIC-pos | QI2375  | 153.0657 | 4.43  | HMDB0004193 | N1_methyl_2_pyridone_5_carboxamide |
| 255 | HILIC-pos | QI2967  | 312.1299 | 5.47  | HMDB0004824 | N2.N2_dimethylguanosine            |
| 256 | HILIC-pos | QI2352  | 286.1031 | 4.39  | HMDB0005923 | N4_acetylcytidine                  |
| 258 | HILIC-pos | QI6453  | 161.1283 | 9.87  | HMDB0002038 | N6_methyllysine                    |
| 259 | HILIC-pos | QI6308  | 175.144  | 10.45 | HMDB0013287 | N6.N6_dimethyllysine               |
| 260 | HILIC-pos | QI6174  | 189.1597 | 11.44 | HMDB0001325 | N6.N6.N6_trimethyllysine           |
| 261 | HILIC-pos | QI6812  | 189.1233 | 8.5   | HMDB0000206 | N6_acetyllysine                    |
| 262 | HILIC-pos | QI2202  | 132.0656 | 3.92  | HMDB0000766 | N_acetylaniline                    |
| 263 | HILIC-pos | QI8888  | 176.0553 | 4.67  | HMDB0000812 | N_acetylaspartic_acid              |
| 266 | HILIC-pos | QI4558  | 198.0849 | 8.49  | HMDB0032055 | N_acetylhistidine                  |
| 270 | HILIC-pos | QI4581  | 175.1076 | 8.54  | HMDB0003357 | N_acetylornithine                  |
| 272 | HILIC-pos | QI7034  | 131.118  | 8.03  | HMDB0002064 | N_acetylputrescine                 |
| 276 | HILIC-pos | QI4491  | 217.1294 | 8.29  | HMDB0004620 | N_alpha_acetylarginine             |
| 277 | HILIC-pos | QI2280  | 133.0609 | 4.23  | HMDB0000026 | N_carbamoyl_beta_alanine           |



|     |           |        |          |      |                 |                            |
|-----|-----------|--------|----------|------|-----------------|----------------------------|
| 280 | HILIC-pos | QI2193 | 123.0557 | 3.88 | HMDB000140<br>6 | niacinamide                |
| 283 | HILIC-pos | QI1731 | 258.2062 | 2.45 | HMDB001327<br>2 | N_lauroylglyci<br>ne       |
| 285 | HILIC-pos | QI6731 | 130.0863 | 8.74 | NA              | N_methylprolin<br>e        |
| 287 | HILIC-pos | QI6533 | 189.1345 | 9.54 | HMDB002941<br>6 | NMMA                       |
| 292 | HILIC-pos | QI4840 | 133.0972 | 9.54 | HMDB000021<br>4 | ornithine                  |
| 295 | HILIC-pos | QI2040 | 220.1178 | 3.17 | HMDB000021<br>0 | pantothenate               |
| 298 | HILIC-pos | QI2534 | 265.118  | 4.73 | HMDB000634<br>4 | phenylacetylglu<br>tamine  |
| 300 | HILIC-pos | TF11   | 166.0863 | 6.83 | HMDB000015<br>0 | phenylalanine              |
| 305 | HILIC-pos | QI4395 | 130.0863 | 8.1  | HMDB000007<br>0 | pipecolic_acid             |
| 306 | HILIC-pos | QI1180 | 286.1435 | 2.02 | HMDB002957<br>7 | piperine                   |
| 308 | HILIC-pos | QI6768 | 173.092  | 8.61 | HMDB001117<br>8 | pro_gly                    |
| 309 | HILIC-pos | QI4460 | 116.0708 | 8.23 | HMDB000016<br>7 | proline                    |
| 310 | HILIC-pos | QI4799 | 144.1017 | 9.36 | HMDB000482<br>7 | proline_betaine            |
| 311 | HILIC-pos | QI2329 | 245.0767 | 4.34 | HMDB000070<br>7 | pseudouridine              |
| 313 | HILIC-pos | QI6515 | 89.1073  | 9.58 | HMDB000141<br>4 | putrescine                 |
| 319 | HILIC-pos | QI2027 | 259.0923 | 3.12 | HMDB000088<br>4 | ribothymidine              |
| 324 | HILIC-pos | TF12   | 203.1502 | 9.82 | HMDB000535<br>4 | SDMA                       |
| 325 | HILIC-pos | QI4205 | 106.0499 | 7.8  | HMDB000018<br>7 | serine                     |
| 326 | HILIC-pos | QI7862 | 177.1021 | 6.4  | HMDB000025<br>0 | serotonin                  |
| 336 | HILIC-pos | QI3402 | 126.0222 | 6.22 | HMDB000025<br>1 | taurine                    |
| 337 | HILIC-pos | QI6460 | 265.1115 | 9.84 | HMDB000025<br>5 | thiamine                   |
| 338 | HILIC-pos | QI4177 | 120.066  | 7.75 | HMDB000016<br>7 | threonine                  |
| 340 | HILIC-pos | QI3152 | 777.6926 | 5.79 | HMDB000024<br>8 | thyroxine                  |
| 341 | HILIC-pos | QI4723 | 138.0548 | 9.03 | HMDB000087<br>5 | trigonelline               |
| 343 | HILIC-pos | QI6911 | 76.0757  | 8.23 | HMDB000092<br>5 | trimethylamine<br>_N_oxide |
| 344 | HILIC-pos | QI716  | 121.1016 | 1.8  | HMDB001373<br>3 | trimethylbenze<br>ne       |
| 347 | HILIC-pos | TF13   | 205.0972 | 6.63 | HMDB000092<br>0 | tryptophan                 |
| 349 | HILIC-pos | TF14   | 182.0812 | 6.94 | HMDB000015<br>8 | tyrosine                   |
| 350 | HILIC-pos | QI2362 | 169.0354 | 4.41 | HMDB000028<br>0 | urate                      |
| 353 | HILIC-pos | QI2452 | 139.05   | 4.61 | HMDB000030<br>1 | urocanic_acid              |
| 354 | HILIC-pos | TF15   | 118.0863 | 7.53 | HMDB000088<br>2 | valine                     |
| 355 | HILIC-pos | QI1391 | 436.2328 | 2.06 | HMDB001452<br>2 | valsartan                  |
| 357 | HILIC-pos | QI328  | 269.2262 | 1.61 | HMDB000030<br>5 | vitamin_A                  |
| 359 | HILIC-pos | QI9174 | 153.0406 | 3.91 | HMDB000029<br>7 | xanthine                   |
| 361 | HILIC-pos | QI2348 | 285.0794 | 4.38 | HMDB000029<br>0 | xanthosine                 |
| 364 | HILIC-pos | QI7037 | 468.3082 | 8.03 | HMDB001057<br>0 | LPC_14_0                   |
| 365 | HILIC-pos | QI7091 | 494.3241 | 7.95 | HMDB001058<br>2 | LPC_16_1                   |
| 366 | HILIC-pos | QI4252 | 496.3395 | 7.89 | HMDB001058<br>7 | LPC_16_0                   |

|     |           |        |          |      |                 |                           |
|-----|-----------|--------|----------|------|-----------------|---------------------------|
| 372 | HILIC-pos | QI7118 | 518.322  | 7.91 | HMDB001038<br>7 | LPC_18_3                  |
| 375 | HILIC-pos | QI7129 | 520.3397 | 7.87 | HMDB001038<br>6 | LPC_18_2                  |
| 377 | HILIC-pos | QI7161 | 522.3554 | 7.82 | HMDB000281<br>5 | LPC_18_1                  |
| 381 | HILIC-pos | QI4189 | 524.3711 | 7.77 | HMDB001038<br>4 | LPC_18_0                  |
| 383 | HILIC-pos | QI7131 | 542.3221 | 7.87 | HMDB001039<br>7 | LPC_20_5                  |
| 384 | HILIC-pos | QI7169 | 544.3396 | 7.8  | HMDB001039<br>5 | LPC_20_4                  |
| 387 | HILIC-pos | QI7282 | 546.354  | 7.64 | HMDB001039<br>4 | LPC_20_3                  |
| 389 | HILIC-pos | QI7260 | 550.3871 | 7.67 | HMDB001039<br>1 | LPC_20_1                  |
| 390 | HILIC-pos | QI7193 | 568.3391 | 7.76 | HMDB001040<br>4 | LPC_22_6                  |
| 391 | HILIC-pos | QI4190 | 570.3552 | 7.77 | HMDB001040<br>2 | LPC_22_5                  |
| 394 | HILIC-pos | QI7200 | 480.3446 | 7.74 | HMDB001040<br>7 | LPC_P_16_0_<br>LPC_O_16_1 |
| 395 | HILIC-pos | QI7102 | 508.376  | 7.94 | HMDB001312<br>2 | LPC_P_18_0_<br>LPC_O_18_1 |
| 401 | HILIC-pos | QI7855 | 454.2926 | 6.42 | HMDB001130<br>3 | LPE_16_0                  |
| 403 | HILIC-pos | QI7849 | 476.2763 | 6.43 | HMDB001147<br>8 | LPE_18_3                  |
| 404 | HILIC-pos | QI3516 | 478.2926 | 6.41 | HMDB001130<br>7 | LPE_18_2                  |
| 405 | HILIC-pos | QI3499 | 480.3083 | 6.37 | HMDB001130<br>6 | LPE_18_1                  |
| 407 | HILIC-pos | QI7893 | 482.3239 | 6.35 | HMDB001113<br>0 | LPE_18_0                  |
| 409 | HILIC-pos | QI3484 | 502.2927 | 6.36 | HMDB001131<br>7 | LPE_20_4                  |
| 410 | HILIC-pos | QI7128 | 508.3398 | 7.87 | HMDB001131<br>2 | LPE_20_1                  |
| 411 | HILIC-pos | QI7153 | 510.3554 | 7.83 | HMDB001131<br>1 | LPE_20_0                  |
| 412 | HILIC-pos | QI7902 | 526.293  | 6.33 | HMDB001132<br>6 | LPE_22_6                  |
| 413 | HILIC-pos | QI7703 | 706.5372 | 6.81 | HMDB000780<br>0 | PC_30_0                   |
| 414 | HILIC-pos | QI3651 | 730.5374 | 6.79 | HMDB000787<br>4 | PC_32_2                   |
| 415 | HILIC-pos | QI3628 | 754.5366 | 6.69 | HMDB000788<br>3 | PC_34_4                   |
| 416 | HILIC-pos | QI7732 | 756.5524 | 6.76 | HMDB000800<br>6 | PC_34_3                   |
| 422 | HILIC-pos | TF5    | 786.5984 | 6.68 | HMDB000803<br>0 | PC_36_2                   |
| 423 | HILIC-pos | QI3624 | 742.5739 | 6.68 | HMDB001121<br>1 | PC_P_34_2_P<br>C_O_34_3   |
| 424 | HILIC-pos | QI7781 | 766.573  | 6.59 | HMDB001122<br>0 | PC_P_36_4_P<br>C_O_36_5   |
| 425 | HILIC-pos | QI3585 | 790.5733 | 6.57 | HMDB001122<br>9 | PC_P_38_6_P<br>C_O_38_7   |
| 426 | HILIC-pos | QI3584 | 792.5889 | 6.56 | HMDB001131<br>9 | PC_P_38_5_P<br>C_O_38_6   |
| 427 | HILIC-pos | QI3059 | 716.5217 | 5.64 | HMDB000892<br>8 | PE_34_2                   |
| 428 | HILIC-pos | QI3658 | 720.5532 | 6.79 | HMDB000892<br>5 | PE_34_0                   |
| 429 | HILIC-pos | QI8353 | 740.5219 | 5.58 | HMDB000893<br>7 | PE_36_4                   |
| 430 | HILIC-pos | QI3037 | 744.5533 | 5.61 | HMDB000899<br>4 | PE_36_2                   |
| 431 | HILIC-pos | QI8361 | 764.521  | 5.56 | HMDB000910<br>2 | PE_38_6                   |
| 432 | HILIC-pos | QI8370 | 768.5524 | 5.54 | HMDB000900<br>3 | PE_38_4                   |
| 433 | HILIC-pos | QI2995 | 792.5527 | 5.52 | HMDB000901<br>2 | PE_40_6                   |

|     |           |         |          |      |            |                                          |
|-----|-----------|---------|----------|------|------------|------------------------------------------|
| 434 | HILIC-pos | QI3031  | 700.5266 | 5.59 | HMDB001134 | PE_P_34_2_P<br>3<br>E_O_34_3             |
| 435 | HILIC-pos | QI3029  | 702.5433 | 5.59 | HMDB000895 | PE_P_34_1_P<br>2<br>E_O_34_2             |
| 436 | HILIC-pos | QI8379  | 724.5268 | 5.52 | HMDB001141 | PE_P_36_4_P<br>0<br>E_O_36_5             |
| 437 | HILIC-pos | QI3015  | 728.5586 | 5.56 | HMDB001144 | PE_P_36_2_P<br>1<br>E_O_36_3             |
| 438 | HILIC-pos | QI8386  | 748.526  | 5.5  | HMDB001142 | PE_P_38_6_P<br>0<br>E_O_38_7             |
| 439 | HILIC-pos | QI2983  | 750.5417 | 5.5  | HMDB001138 | PE_P_38_5_P<br>7<br>E_O_38_6             |
| 441 | HILIC-pos | QI8393  | 752.5574 | 5.49 | HMDB001138 | PE_P_38_4_P<br>6<br>E_O_38_5             |
| 443 | HILIC-pos | QI2966  | 776.5578 | 5.47 | HMDB001139 | PE_P_40_6_P<br>4<br>E_O_40_7             |
| 444 | HILIC-pos | QI3692  | 772.5472 | 6.83 | NA         | PS_P_36_2_PS<br>_O_36_3                  |
| 445 | HILIC-pos | QI7669  | 774.5632 | 6.86 | NA         | PS_P_36_1_PS<br>_O_36_2                  |
| 446 | HILIC-pos | QI3909  | 675.5423 | 7.36 | HMDB001209 | SM_d18_1_14<br>7<br>_0                   |
| 447 | HILIC-pos | QI3891  | 701.5583 | 7.33 | HMDB024061 | SM_d18_1_16<br>3<br>_1                   |
| 449 | HILIC-pos | QI7488  | 703.5733 | 7.31 | HMDB001016 | SM_d18_1_16<br>9<br>_0                   |
| 453 | HILIC-pos | QI7508  | 729.5897 | 7.25 | HMDB001210 | SM_d18_1_18<br>1<br>_1                   |
| 454 | HILIC-pos | QI3856  | 731.6054 | 7.24 | HMDB000134 | SM_d18_1_18<br>8<br>_0                   |
| 456 | HILIC-pos | QI7554  | 759.636  | 7.16 | HMDB001210 | SM_d18_1_20<br>2<br>_0                   |
| 457 | HILIC-pos | QI7567  | 785.6517 | 7.12 | HMDB001210 | SM_d18_1_22<br>4<br>_1                   |
| 458 | HILIC-pos | QI3807  | 787.6675 | 7.12 | HMDB001210 | SM_d18_1_22<br>3<br>_0                   |
| 462 | HILIC-pos | QI8162  | 300.2893 | 5.9  | HMDB000025 | sphingosine                              |
| 465 | HILIC-pos | QI8149  | 302.305  | 5.92 | HMDB000026 | sphinganine                              |
| 466 | HILIC-pos | QI963   | 538.5196 | 1.92 | HMDB000494 | Cer_d18_1_16<br>9<br>_0                  |
| 467 | HILIC-pos | QI867   | 648.6285 | 1.87 | HMDB000495 | Cer_d18_1_24<br>3<br>_1                  |
| 469 | HILIC-pos | QI11015 | 612.5558 | 1.64 | HMDB000710 | C34_1_DAG_o<br>2<br>r_TAG_NH4_a<br>dduct |

**Supplementary table 2. Surrogat**

|                            | <b>Overall</b>                  | <b>Prediabetes maintenance (PDM)</b> |
|----------------------------|---------------------------------|--------------------------------------|
|                            | <b>(n=82)</b>                   | <b>(n=52)</b>                        |
| Matsuda index (ISI)        | 0.91 (0.52 – 1.41)              | 0.95 (0.55 -1.38)                    |
| OGIS                       | 381.45 ± 79.01                  | 384.66 + 84.77                       |
| Oral disposition index     | 0.11 (0.06- 0.20)               | 0.11 (0.05 -0.15)                    |
| Early insulin response 30' | 1.06 (0.53 -1.61)               | 0.92 (0.49 -1.49)                    |
| HOMA-IR                    | 2.15 (1.50 -3.48)               | 1.95 (1.40 -3.00)                    |
| HOMA-B                     | 29.14 (19.79 -43.75)            | 29.31 (19.24 – 36.67)                |
| tAUC glucose               | 24351.45 ± 4459                 | 24637.50 ± 4386.86                   |
| iAUC glucose               | 1413.04 ± 1845                  | 1479.18 ± 1823.80                    |
| tAUC insulin               | 11707.5<br>(7215.00 - 18720.00) | 10528.5 (6891 – 18795)               |
| iAUC insulin               | 9511.5 (6304 – 16020)           | 8982 (5955 – 15157)                  |

Data are presented as mean and standard deviation, and median and interquartile range according to the ROC Curve. Differences between the two groups were computed with Chi2 for qualitative

tes of insulin secretion and sensitivity

| <b>Prediabetes regression</b> | <i>p value</i> | <i>P value adjusted by age, sex, age<sup>2</sup> and BMI</i> |
|-------------------------------|----------------|--------------------------------------------------------------|
| <b>(n=30)</b>                 |                |                                                              |
| 0.78 (0.52 – 1.41)            | 0.564          | 0.414                                                        |
| 375.71 ± 68.63                | 0.757          | 0.879                                                        |
| 0.11 (0.08 -0.25)             | 0.174          | 0.131                                                        |
| 1.36 (0.74 -2.34)             | 0.047          | 0.338                                                        |
| 2.40 (1.52 -3.68)             | 0.378          | 0.281                                                        |
| 28.87 (21.38 -46.68)          | 0.488          | 0.281                                                        |
| 24329 ± 4688.62               | 0.646          | 0.844                                                        |
| 1283.40 ± 1917.49             | 0.37           | 0.645                                                        |
| 13382.25 (8683 – 18432)       | 0.362          | 0.504                                                        |
| 11436 (7113.38 – 16399)       | 0.393          | 0.552                                                        |

o distribution. HOMA-IR. Homeostasis Model Assessment. TG. Triglycerides. AUC. Area Under the e variables, t-test for parametric variables, and Wilcoxon for non-parametric variables.

Supplementary Table 3. Changes in metabolic par

|                         | <b>Overall<br/>(N=82)</b> | <b>Prediabetes<br/>Maintenance (PDM)<br/>(n=52)</b> |
|-------------------------|---------------------------|-----------------------------------------------------|
| △                       |                           |                                                     |
| Fasting glucose (mg/dL) | 4.00 (-9.00 - 2.00)       | -2.00 (-6.00 - 3.00)                                |
| △                       |                           |                                                     |
| 2h glucose(mg/dL)       | 23.32                     | 26.32                                               |
| △                       |                           |                                                     |
| Hba1c %                 | -0.01                     | 0.06                                                |
| △ Fasting insulin       |                           |                                                     |
|                         | -1.15 (-3.55 – 1.65)      | -0.95 (-2.55 – 1.55)                                |
| △ ODI                   |                           |                                                     |
|                         | 0.01 (-0.07 – 0.06)       | 0.01 (-0.04 -0.07)                                  |

△ OGIS

21.05 ± 80.11

23.44 ± 81.49

---

△

Weight (kg)

1.01

0.79

---

△

Waist circumference (cm)

-10.12

4.5

---

△

Body fat mass

-0.76 (-2.3 – 0.49)

-0.80 (-2.45 - 0.5)

---

△

Free fat mass index

-0.2 (-0.54 - 0.12)

-0.12 (0.47 – 0.17)

---

△

VAT (cm<sup>3</sup>)

-56.50 (-204.25 - 90.50)

-54 (-224 – 106)

---

△

|                      |                             |                    |            |   |
|----------------------|-----------------------------|--------------------|------------|---|
| Energy intake (kcal) | -288.06 (-1043.70 - 241.88) | -223.39<br>326.15) | (-994.37 – | – |
|----------------------|-----------------------------|--------------------|------------|---|

△

|                     |       |       |
|---------------------|-------|-------|
| Fat consumption (%) | 13.13 | 13.31 |
|---------------------|-------|-------|

△

|                         |                    |                     |
|-------------------------|--------------------|---------------------|
| Protein consumption (%) | 4.70 (-1.60- 8.32) | 1.20 (-2.40 - 6.90) |
|-------------------------|--------------------|---------------------|

△

|                          |       |       |
|--------------------------|-------|-------|
| Carbohydrate consumption | 14.17 | 16.46 |
|--------------------------|-------|-------|

(%)

△

|                         |                        |                       |
|-------------------------|------------------------|-----------------------|
| Sugar daily consumption | -6.75 (-48.24 - 18.18) | 0.00 (-42.67 – 21.44) |
|-------------------------|------------------------|-----------------------|

(gr)

△ T1D/A1C. Hemoglobin A1C. ODI. Oral Disposition Index. OGIS. Oral glucose insulin sensitivity index. P2. Post-intervention P2. P1. Pre-intervention P1. SD. Standard deviation and standard deviation or median and interquartile range according to distribution. D. Difference between baseline vs post-intervention P2 value was computed comparing | adjusting by age, age<sup>2</sup>, sex, and BMI



ameters after 24 weeks of treatment

| <b>Regression to normal<br/>glucose tolerance (RNGT)<br/>(n=30)</b> | <b>P value 1</b> | <b>P value 2</b> |
|---------------------------------------------------------------------|------------------|------------------|
| -6.50 (-9.75 - -1.00)                                               | 0.0006*          | 0.101            |
| 18.04                                                               | 0.062            | 0.487            |
| -0.17                                                               | 0.00001*         | <0.001*          |
| -2.20 (-4.25 – 2.25)                                                | 0.522            | 0.475            |
| -0.01 (-0.12 – 0.04)                                                | 0.778            | 0.114            |

|               |        |       |
|---------------|--------|-------|
| 16.79 ± 78.89 | 0.022* | 0.742 |
|---------------|--------|-------|

---

|      |          |       |
|------|----------|-------|
| 1.45 | 0.00001* | 0.327 |
|------|----------|-------|

---

|       |         |       |
|-------|---------|-------|
| -12.3 | 0.0016* | 0.542 |
|-------|---------|-------|

---

|                     |       |       |
|---------------------|-------|-------|
| -0.70 (-2.0 – 0.37) | 0.055 | 0.859 |
|---------------------|-------|-------|

---

|                       |       |      |
|-----------------------|-------|------|
| -0.32 (-0.57 - -0.02) | 0.585 | 0.34 |
|-----------------------|-------|------|

---

|                     |       |      |
|---------------------|-------|------|
| -66 (-171.5 – 49.5) | 0.493 | 0.99 |
|---------------------|-------|------|

---

|                             |        |        |
|-----------------------------|--------|--------|
| -599.28 (-1139.65 – 116.13) | 0.003* | 0.1    |
| <hr/>                       |        |        |
| 13.04                       | 0.484  | 0.74   |
| <hr/>                       |        |        |
| 5.65 (0.67 – 9.43)          | 0.002* | 0.027* |
| <hr/>                       |        |        |
| 9.56                        | 0.32   | 0.175  |
| <hr/>                       |        |        |
| -23.21 (-63.50 - 2.05)      | 0.108  | 0.118  |

activity index. VAT, visceral Adipose tissue. Data are presented as mean  
 delta was computed final visit results/baseline visit. P1 represents the  
 prediabetes maintenance and regression to normal tolerance

Supplementary table 4. Metabolites selected at least 10 times at baseline for th

| Metabolites                           | times selected |  |  |
|---------------------------------------|----------------|--|--|
| PS.P.36.1.PS.O.36.2                   | 15             |  |  |
| C5.1.carnitine                        | 11             |  |  |
| Cer.d18.1.24.1                        | 10             |  |  |
| phenylacetylglutamine                 | 9              |  |  |
| myristoleic.acid                      | 9              |  |  |
| adenosine                             | 8              |  |  |
| cyclohexylamine                       | 7              |  |  |
| X7.methylxanthine                     | 6              |  |  |
| PE.P.40.6.PE.O.40.7                   | 6              |  |  |
| thyroxine                             | 5              |  |  |
| Sd18.1.22.0                           | 5              |  |  |
| piperine                              | 4              |  |  |
| N.acetylhistidine                     | 4              |  |  |
| ectoine                               | 4              |  |  |
| X4.acetamidobutanoate                 | 3              |  |  |
| X1.7.dimethyluric.acid                | 3              |  |  |
| ribothymidine                         | 3              |  |  |
| PC.P.38.6.PC.O.38.7                   | 3              |  |  |
| C6.carnitine                          | 3              |  |  |
| C12.1.carnitine                       | 3              |  |  |
| betaine                               | 3              |  |  |
| arginine                              | 3              |  |  |
| acetylcholine                         | 3              |  |  |
| X5.acetylamino.6.amino.3.methyluracil | 2              |  |  |
| vitamin.A                             | 2              |  |  |
| trimethylamine.N.oxide                | 2              |  |  |
| Sd18.1.18.0                           | 2              |  |  |
| PE.P.38.4.PE.O.38.5                   | 2              |  |  |
| PC.P.38.5.PC.O.38.6                   | 2              |  |  |
| LPE.20.0                              | 2              |  |  |
| hydroxyproline                        | 2              |  |  |
| cortisol                              | 2              |  |  |
| citrulline                            | 2              |  |  |
| Cer.d18.1.16.0                        | 2              |  |  |
| C4.carnitine                          | 2              |  |  |
| C12.carnitine                         | 2              |  |  |
| alpha.glycerophosphocholine           | 2              |  |  |
| X2.hydroxyhippurate                   | 1              |  |  |
| X2.aminooctanoate                     | 1              |  |  |
| X2.aminoheptanoic.acid                | 1              |  |  |
| valsartan                             | 1              |  |  |

|                                          |   |  |  |  |
|------------------------------------------|---|--|--|--|
| urocanic.acid                            | 1 |  |  |  |
| trimethylbenzene                         | 1 |  |  |  |
| sphinganine                              | 1 |  |  |  |
| Sd18.1.18.1                              | 1 |  |  |  |
| Sd18.1.16.0                              | 1 |  |  |  |
| PS.P.36.2.PS.O.36.3                      | 1 |  |  |  |
| proline.betaine                          | 1 |  |  |  |
| pro.gly                                  | 1 |  |  |  |
| N6.acetyllysine                          | 1 |  |  |  |
| N4.acetylcytidine                        | 1 |  |  |  |
| N1.methyl.2.pyridone.5.carboxamide       | 1 |  |  |  |
| N.methylproline                          | 1 |  |  |  |
| N.carbamoyl.beta.alanine                 | 1 |  |  |  |
| N.acetylaspartic.acid                    | 1 |  |  |  |
| methylimidazoleacetic.acid               | 1 |  |  |  |
| LPE.18.0                                 | 1 |  |  |  |
| LPC.P.18.0.LPC.O.18.1                    | 1 |  |  |  |
| LPC.18.0                                 | 1 |  |  |  |
| homocitrulline                           | 1 |  |  |  |
| glycodeoxycholate.glycochenodeoxycholate | 1 |  |  |  |
| glycine                                  | 1 |  |  |  |
| glutamate                                | 1 |  |  |  |
| gabapentin                               | 1 |  |  |  |
| GABA                                     | 1 |  |  |  |
| cystine                                  | 1 |  |  |  |
| creatinine                               | 1 |  |  |  |
| creatine                                 | 1 |  |  |  |
| cinnamoylglycine                         | 1 |  |  |  |
| C5.DC.carnitine                          | 1 |  |  |  |
| biliverdin                               | 1 |  |  |  |
| xanthosine                               | 1 |  |  |  |





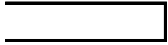



Supplementary table 5. Metabolites (fold change) selected their associ

| Metabolites                 | times selecte | HMDB        |  |
|-----------------------------|---------------|-------------|--|
| vitamin.A                   | 100           | HMDB0000305 |  |
| Cer.d18.1.16.0              | 54            | HMDB0004949 |  |
| X1.7.dimethyluric.acid      | 47            | HMDB0011103 |  |
| Sd18.1.22.1                 | 41            | HMDB0012104 |  |
| PC.P.38.5.PC.O.38.6         | 39            | HMDB0011387 |  |
| Sd18.1.14.0                 | 38            | HMDB0012097 |  |
| LPC.18.3                    | 37            | HMDB0010387 |  |
| acetyl.galactosamine        | 35            | HMDB0000212 |  |
| trigonelline                | 34            | HMDB0000875 |  |
| tryptophan                  | 34            | HMDB0000929 |  |
| GABA                        | 27            | HMDB0000112 |  |
| allantoin                   | 26            | HMDB0000462 |  |
| N.carbamoyl.beta.alanine    | 26            | HMDB0000026 |  |
| carnitine                   | 25            | HMDB0000062 |  |
| X1.methylhistamine          | 22            | HMDB0000898 |  |
| C18.carnitine               | 21            | HMDB0000848 |  |
| LPC.18.1                    | 21            | HMDB0002815 |  |
| N6.N6.N6.trimethyllysine    | 21            | HMDB0001325 |  |
| Sd18.1.20.0                 | 21            | HMDB0012102 |  |
| C10.2.carnitine             | 20            | HMDB0000651 |  |
| N6.methyllysine             | 20            | HMDB0002038 |  |
| LPC.18.0                    | 19            | HMDB0010384 |  |
| X2.methylguanosine          | 19            | HMDB0005862 |  |
| C5.DC.carnitine             | 18            | HMDB0013130 |  |
| X7.methylguanine            | 17            | HMDB0000897 |  |
| LPC.P.16.0.LPC.O.16.1       | 16            | HMDB0010382 |  |
| thyroxine                   | 16            | HMDB0000248 |  |
| C4.OH.carnitine             | 14            | HMDB0013127 |  |
| PE.40.6                     | 14            | HMDB0009012 |  |
| putrescine                  | 14            | HMDB0001414 |  |
| creatine                    | 13            | HMDB0000064 |  |
| LPC.14.0                    | 12            | HMDB0010379 |  |
| LPC.16.0                    | 12            | HMDB0010382 |  |
| N.acetylalanine             | 12            | HMDB0000766 |  |
| alpha.glycerophosphocholine | 11            | HMDB0000086 |  |
| PE.P.40.6.PE.O.40.7         | 11            | HMDB0011394 |  |
| C3.carnitine                | 10            | HMDB0000824 |  |
| glutamine                   | 10            | HMDB0000641 |  |
| hydroxyproline              | 10            | HMDB0000725 |  |
| PE.P.36.2.PE.O.36.3         | 10            | HMDB0011343 |  |
| C12.1.carnitine             | 9             |             |  |

|                                       |   |  |  |
|---------------------------------------|---|--|--|
| C18.1.carnitine                       | 9 |  |  |
| C18.2.carnitine                       | 9 |  |  |
| N.acetylornithine                     | 9 |  |  |
| N.acetylputrescine                    | 9 |  |  |
| PC.34.3                               | 9 |  |  |
| PS.P.36.1.PS.O.36.2                   | 9 |  |  |
| acisoga                               | 8 |  |  |
| C14.2.carnitine                       | 8 |  |  |
| LPE.20.4                              | 8 |  |  |
| N1.methyl.2.pyridone.5.carboxamide    | 8 |  |  |
| PE.36.2                               | 8 |  |  |
| urate                                 | 8 |  |  |
| citrulline                            | 7 |  |  |
| dimethylglycine                       | 7 |  |  |
| methionine.sulfoxide                  | 7 |  |  |
| methylimidazoleacetic.acid            | 7 |  |  |
| N.acetylaspartic.acid                 | 7 |  |  |
| NMMA                                  | 7 |  |  |
| cystine                               | 6 |  |  |
| gabapentin                            | 6 |  |  |
| PC.32.2                               | 6 |  |  |
| PC.P.36.4.PC.O.36.5                   | 6 |  |  |
| PE.P.38.5.PE.O.38.6                   | 6 |  |  |
| trimethylamine.N.oxide                | 6 |  |  |
| X2.hydroxyhippurate                   | 6 |  |  |
| adenosine                             | 5 |  |  |
| arginine                              | 5 |  |  |
| bilirubin                             | 5 |  |  |
| guanidinoacetic.acid                  | 5 |  |  |
| homocysteine                          | 5 |  |  |
| PC.P.34.2.PC.O.34.3                   | 5 |  |  |
| X4.aminohippuric.acid                 | 5 |  |  |
| X5.acetylamino.6.amino.3.methyluracil | 5 |  |  |
| X5.methylcytidine                     | 5 |  |  |
| X7.methylxanthine                     | 5 |  |  |
| C20.4.carnitine                       | 4 |  |  |
| LPC.18.2                              | 4 |  |  |
| LPC.22.5                              | 4 |  |  |
| LPE.18.3                              | 4 |  |  |
| N.lauroylglycine                      | 4 |  |  |
| PE.38.4                               | 4 |  |  |
| pipecolic.acid                        | 4 |  |  |
| SDMA                                  | 4 |  |  |

|                       |   |  |  |
|-----------------------|---|--|--|
| sphingosine           | 4 |  |  |
| threonine             | 4 |  |  |
| butyrobetaine         | 3 |  |  |
| C16.carnitine         | 3 |  |  |
| C6.carnitine          | 3 |  |  |
| caffeine              | 3 |  |  |
| cinnamoylglycine      | 3 |  |  |
| cortisol              | 3 |  |  |
| cyclohexylamine       | 3 |  |  |
| diacetylspermine      | 3 |  |  |
| DMGV                  | 3 |  |  |
| glycine               | 3 |  |  |
| isoleucine            | 3 |  |  |
| LPC.20.3              | 3 |  |  |
| LPE.18.1              | 3 |  |  |
| LPE.20.0              | 3 |  |  |
| myristoleic.acid      | 3 |  |  |
| ornithine             | 3 |  |  |
| PC.30.0               | 3 |  |  |
| PC.34.4               | 3 |  |  |
| PE.P.38.4.PE.O.38.5   | 3 |  |  |
| phenylacetylglutamine | 3 |  |  |
| pro.gly               | 3 |  |  |
| Sd18.1.18.1           | 3 |  |  |
| serotonin             | 3 |  |  |
| trimethylbenzene      | 3 |  |  |
| X3.methylxanthine     | 3 |  |  |
| betaine               | 2 |  |  |
| C7.carnitine          | 2 |  |  |
| cytosine              | 2 |  |  |
| ectoine               | 2 |  |  |
| hydroxycotinine       | 2 |  |  |
| kynurenic.acid        | 2 |  |  |
| leucine               | 2 |  |  |
| LPC.16.1              | 2 |  |  |
| methionine            | 2 |  |  |
| PC.36.2               | 2 |  |  |
| PE.P.38.6.PE.O.38.7   | 2 |  |  |
| pseudouridine         | 2 |  |  |
| Sd18.1.16.0           | 2 |  |  |
| Sd18.1.18.0           | 2 |  |  |
| Sd18.1.22.0           | 2 |  |  |
| thiamine              | 2 |  |  |

|                                          |   |  |  |
|------------------------------------------|---|--|--|
| urocanic.acid                            | 2 |  |  |
| valsartan                                | 2 |  |  |
| X2.aminoheptanoic.acid                   | 2 |  |  |
| acetylcholine                            | 1 |  |  |
| asparagine                               | 1 |  |  |
| C10.carnitine                            | 1 |  |  |
| C12.carnitine                            | 1 |  |  |
| C26.carnitine                            | 1 |  |  |
| C4.carnitine                             | 1 |  |  |
| C5.carnitine                             | 1 |  |  |
| choline                                  | 1 |  |  |
| glycocholate                             | 1 |  |  |
| glycodeoxycholate.glycochenodeoxycholate | 1 |  |  |
| id_number.xpred-141                      | 1 |  |  |
| id_number.xpred-151                      | 1 |  |  |
| id_number.xpred-172                      | 1 |  |  |
| linoleoyl.ethanolamide                   | 1 |  |  |
| LPC.20.1                                 | 1 |  |  |
| LPC.20.4                                 | 1 |  |  |
| LPC.22.6                                 | 1 |  |  |
| lysine                                   | 1 |  |  |
| N6.acetyllysine                          | 1 |  |  |
| phenylalanine                            | 1 |  |  |
| piperine                                 | 1 |  |  |
| proline.betaine                          | 1 |  |  |
| PS.P.36.2.PS.O.36.3                      | 1 |  |  |
| Sd18.1.16.1                              | 1 |  |  |
| serine                                   | 1 |  |  |
| taurine                                  | 1 |  |  |
| valine                                   | 1 |  |  |
| X2.aminooctanoate                        | 1 |  |  |
| X5.hydroxytryptophan                     | 1 |  |  |
| xanthine                                 | 1 |  |  |

ation with regression to normoglycemia with LASSO regression

|  |  |  |  |  |  |  |
|--|--|--|--|--|--|--|
|  |  |  |  |  |  |  |
|  |  |  |  |  |  |  |
|  |  |  |  |  |  |  |
|  |  |  |  |  |  |  |
|  |  |  |  |  |  |  |
|  |  |  |  |  |  |  |
|  |  |  |  |  |  |  |
|  |  |  |  |  |  |  |
|  |  |  |  |  |  |  |
|  |  |  |  |  |  |  |
|  |  |  |  |  |  |  |
|  |  |  |  |  |  |  |
|  |  |  |  |  |  |  |
|  |  |  |  |  |  |  |
|  |  |  |  |  |  |  |
|  |  |  |  |  |  |  |
|  |  |  |  |  |  |  |
|  |  |  |  |  |  |  |
|  |  |  |  |  |  |  |
|  |  |  |  |  |  |  |
|  |  |  |  |  |  |  |
|  |  |  |  |  |  |  |
|  |  |  |  |  |  |  |
|  |  |  |  |  |  |  |
|  |  |  |  |  |  |  |
|  |  |  |  |  |  |  |
|  |  |  |  |  |  |  |
|  |  |  |  |  |  |  |
|  |  |  |  |  |  |  |
|  |  |  |  |  |  |  |
|  |  |  |  |  |  |  |
|  |  |  |  |  |  |  |
|  |  |  |  |  |  |  |
|  |  |  |  |  |  |  |
|  |  |  |  |  |  |  |

Supplementary table 6. Metabolites

|                             | logFC      | t          | P.Value    | adj.P.Val  |
|-----------------------------|------------|------------|------------|------------|
| <b>cystine</b>              | 0.56118248 | 4.77221763 | 6.52E-06   | 0.00140743 |
| <b>hypotaurine</b>          | 0.48828891 | 4.46364171 | 2.20E-05   | 0.00237235 |
| <b>sphinganine</b>          | 0.64354987 | 4.25049618 | 4.95E-05   | 0.0035622  |
| <b>C14.carnitine</b>        | -0.4657375 | -3.7291174 | 0.00032516 | 0.01344287 |
| <b>PS.P.36.2.PS.O.36.3</b>  | -0.3024346 | -3.717713  | 0.00033824 | 0.01344287 |
| <b>inosine</b>              | -0.4511111 | -3.6468866 | 0.00043139 | 0.01344287 |
| <b>taurine</b>              | 0.45433261 | 3.64400476 | 0.00043565 | 0.01344287 |
| <b>thyroxine</b>            | -0.3533607 | -3.5358338 | 0.00062784 | 0.01695174 |
| <b>myristoleic.acid</b>     | -0.2996608 | -3.4909908 | 0.00072901 | 0.01749613 |
| <b>X5.hydroxytryptophan</b> | 0.46336451 | 3.39322308 | 0.00100529 | 0.02027298 |
| <b>serotonin</b>            | 0.46188273 | 3.38503854 | 0.00103242 | 0.02027298 |
| <b>glycine</b>              | 0.25241144 | 3.20554411 | 0.00183138 | 0.02987869 |
| <b>pro.gly</b>              | 0.47810208 | 3.20113902 | 0.00185683 | 0.02987869 |
| <b>niacinamide</b>          | -0.4422621 | -3.1876935 | 0.00193658 | 0.02987869 |
| pantothenate                | -0.3319995 | -2.9743375 | 0.00371403 | 0.05348201 |
| Sd18.1.18.0                 | -0.3143789 | -2.9312361 | 0.00422043 | 0.05697575 |
| N.acetylputrescine          | -0.282156  | -2.8686727 | 0.00506929 | 0.06234547 |
| LPC.P.16.0.LPC.O.16.1       | 0.2857317  | 2.84691281 | 0.00539951 | 0.06234547 |
| PS.P.36.1.PS.O.36.2         | -0.3150078 | -2.8415356 | 0.00548409 | 0.06234547 |
| C2.carnitine                | -0.3490149 | -2.7804263 | 0.00653444 | 0.0705719  |
| C16.carnitine               | -0.384517  | -2.7581464 | 0.00696101 | 0.07159898 |
| hippurate                   | 0.3050117  | 2.65520279 | 0.009281   | 0.09112258 |
| LPC.20.1                    | 0.28787271 | 2.61565566 | 0.01034465 | 0.09714976 |
| PE.40.6                     | -0.2033433 | -2.5630324 | 0.0119306  | 0.10737538 |
| X1.methyladenosine          | -0.2581428 | -2.5321417 | 0.01296052 | 0.11197888 |
| LPC.18.2                    | 0.29400911 | 2.48404863 | 0.01472349 | 0.1223182  |
| caffeine                    | -0.2624567 | -2.455292  | 0.01587744 | 0.1243893  |
| LPC.18.1                    | 0.27483372 | 2.44486538 | 0.0163154  | 0.1243893  |
| X1.methylnicotinamide       | -0.3300825 | -2.4359033 | 0.01670041 | 0.1243893  |
| C6.carnitine                | -0.2902056 | -2.4053435 | 0.01807492 | 0.12564457 |
| X7.methylguanaine           | -0.2183316 | -2.3963808 | 0.01849669 | 0.12564457 |
| xanthine                    | -0.3056972 | -2.3939201 | 0.01861401 | 0.12564457 |
| N2.N2.dimethylguanosine     | -0.240678  | -2.3740194 | 0.01958735 | 0.12820814 |
| bilirubin                   | 0.28852147 | 2.34437845 | 0.02112083 | 0.13417942 |
| N.lauroylglycine            | -0.2474167 | -2.3205182 | 0.02243146 | 0.13538592 |
| PC.30.0                     | -0.2849873 | -2.3181688 | 0.02256432 | 0.13538592 |
| C7.carnitine                | -0.2746426 | -2.2813599 | 0.02473838 | 0.14340302 |
| PE.38.6                     | -0.1884646 | -2.2734601 | 0.02522831 | 0.14340302 |
| LPC.20.4                    | 0.20820304 | 2.21821584 | 0.02889904 | 0.15739536 |
| LPE.22.6                    | -0.2626752 | -2.2121855 | 0.02932672 | 0.15739536 |
| Sd18.1.18.1                 | -0.2218476 | -2.2045525 | 0.02987597 | 0.15739536 |

|                                    |            |            |            |            |
|------------------------------------|------------|------------|------------|------------|
| asparagine                         | 0.24727463 | 2.1610062  | 0.03318441 | 0.17066267 |
| Sd18.1.14.0                        | -0.2116682 | -2.150748  | 0.03400862 | 0.17070407 |
| trimethylbenzene                   | -0.2024874 | -2.1271242 | 0.0359746  | 0.17070407 |
| acetyl.galactosamine               | -0.2064157 | -2.1269212 | 0.03599191 | 0.17070407 |
| urate                              | -0.2263797 | -2.1226986 | 0.03635364 | 0.17070407 |
| C4.OH.carnitine                    | -0.262321  | -2.0991318 | 0.03843087 | 0.17661845 |
| LPE.18.0                           | 0.24266942 | 2.03156136 | 0.04496369 | 0.1977704  |
| LPC.P.18.0.LPC.O.18.1              | 0.23261494 | 2.02494741 | 0.04565151 | 0.1977704  |
| Sd18.1.16.1                        | -0.1787309 | -2.0150746 | 0.04669497 | 0.1977704  |
| biliverdin                         | -0.2132152 | -2.0150669 | 0.04669579 | 0.1977704  |
| N.acetylalanine                    | -0.2036638 | -1.9673194 | 0.05203456 | 0.21614355 |
| N1.methyl.2.pyridone.5.carboxamide | -0.2460852 | -1.9568056 | 0.0532774  | 0.21713055 |
| pseudouridine                      | -0.1694091 | -1.8956703 | 0.06101356 | 0.24405426 |
| cinnamoylglycine                   | 0.21596527 | 1.8665038  | 0.06502522 | 0.25537179 |
| LPE.18.1                           | 0.23463696 | 1.835859   | 0.06947594 | 0.26684646 |
| N.methylproline                    | -0.2495608 | -1.8160875 | 0.07248018 | 0.26684646 |
| C18.1.carnitine                    | -0.2507949 | -1.8141492 | 0.07278043 | 0.26684646 |
| choline                            | -0.1952357 | -1.8134524 | 0.07288862 | 0.26684646 |
| methionine.sulfoxide               | 0.20023337 | 1.80064219 | 0.07490154 | 0.26964554 |
| C14.1.carnitine                    | -0.2393701 | -1.7605009 | 0.08150971 | 0.28862454 |
| cytosine                           | -0.2132408 | -1.7170024 | 0.08920549 | 0.30756454 |
| Sd18.1.22.0                        | -0.1836851 | -1.6988038 | 0.09259696 | 0.30756454 |
| LPC.20.3                           | 0.21075494 | 1.69379012 | 0.09354957 | 0.30756454 |
| arginine                           | 0.18215843 | 1.69174408 | 0.0939406  | 0.30756454 |
| acisoga                            | -0.1923304 | -1.6915485 | 0.09397806 | 0.30756454 |
| N4.acetylcytidine                  | -0.1411256 | -1.6492371 | 0.10236983 | 0.33002811 |
| LPC.20.5                           | 0.19598025 | 1.62789971 | 0.10682597 | 0.33682481 |
| Sd18.1.20.0                        | -0.166945  | -1.6171259 | 0.1091346  | 0.33682481 |
| LPC.18.0                           | 0.1850398  | 1.61113813 | 0.1104349  | 0.33682481 |
| PE.34.0                            | -0.1959091 | -1.6098531 | 0.11071556 | 0.33682481 |
| LPE.20.0                           | 0.19708051 | 1.59568843 | 0.11384738 | 0.34154215 |
| GABA                               | -0.1796392 | -1.5645624 | 0.12097825 | 0.35405856 |
| alanine                            | 0.20209089 | 1.55716228 | 0.12272476 | 0.35405856 |
| PE.P.38.6.PE.O.38.7                | -0.1855823 | -1.5562687 | 0.122937   | 0.35405856 |
| PC.P.34.2.PC.O.34.3                | 0.1431997  | 1.54314051 | 0.1260889  | 0.35835794 |
| citrulline                         | 0.16638177 | 1.51293224 | 0.13358422 | 0.37195452 |
| piperine                           | -0.1931699 | -1.4936661 | 0.13854457 | 0.37195452 |
| C3.DC.CH3.carnitine                | -0.1292942 | -1.492119  | 0.13894908 | 0.37195452 |
| X4.acetamidobutanoate              | -0.1483395 | -1.4893247 | 0.13968201 | 0.37195452 |
| PC.32.2                            | -0.1791517 | -1.4890094 | 0.13976489 | 0.37195452 |
| X1.methylguanosine                 | -0.1949676 | -1.4835548 | 0.14120496 | 0.37195452 |
| C12.carnitine                      | -0.2001572 | -1.4406232 | 0.15294685 | 0.39803035 |
| N.acetylaspartic.acid              | 0.20717165 | 1.42497748 | 0.15740883 | 0.40476555 |

|                                          |            |            |            |            |
|------------------------------------------|------------|------------|------------|------------|
| PC.P.36.4.PC.O.36.5                      | 0.15538663 | 1.41194544 | 0.16120135 | 0.40964107 |
| X3.methylxanthine                        | -0.1441937 | -1.3955431 | 0.16607383 | 0.4165119  |
| X1.7.dimethyluric.acid                   | -0.1437281 | -1.3899469 | 0.16776174 | 0.4165119  |
| PE.34.2                                  | -0.1253309 | -1.3779478 | 0.17142492 | 0.42077026 |
| C5.1.carnitine                           | -0.1433486 | -1.3598233 | 0.17707303 | 0.42682154 |
| X2.aminoisobutyric.acid                  | -0.1292841 | -1.3480638 | 0.18081223 | 0.42682154 |
| N6.acetyllysine                          | -0.1349063 | -1.3414348 | 0.18294616 | 0.42682154 |
| C12.1.carnitine                          | -0.177118  | -1.33837   | 0.18393909 | 0.42682154 |
| X1.methylhistamine                       | 0.1425841  | 1.3357421  | 0.18479375 | 0.42682154 |
| diacetylspermine                         | -0.1365789 | -1.3328235 | 0.18574641 | 0.42682154 |
| N1.acetylspermidine                      | -0.1577492 | -1.2836652 | 0.20235092 | 0.46008209 |
| PE.P.36.4.PE.O.36.5                      | 0.15434071 | 1.26249791 | 0.20982988 | 0.47211723 |
| carnitine                                | -0.1151537 | -1.2377859 | 0.21881614 | 0.4851729  |
| N6.N6.N6.trimethyllysine                 | -0.1529901 | -1.2342495 | 0.22012474 | 0.4851729  |
| creatinine.y                             | -0.0977873 | -1.1937171 | 0.23553202 | 0.50622427 |
| linoleoyl.ethanolamide                   | -0.1397724 | -1.1921272 | 0.23615181 | 0.50622427 |
| valine                                   | -0.1251492 | -1.184878  | 0.23899257 | 0.50622427 |
| proline.betaine                          | -0.1640154 | -1.1819584 | 0.24014356 | 0.50622427 |
| Sd18.1.16.0                              | -0.1307243 | -1.1787979 | 0.24139398 | 0.50622427 |
| PC.34.3                                  | -0.1308011 | -1.1408267 | 0.25678184 | 0.53331614 |
| phenylalanine                            | -0.1078506 | -1.1279185 | 0.26216722 | 0.53745072 |
| PE.36.4                                  | -0.0920375 | -1.1241626 | 0.26374897 | 0.53745072 |
| glycodeoxycholate.glycochenodeoxycholate | 0.11946815 | 1.10981742 | 0.26985176 | 0.54474748 |
| C14.2.carnitine                          | -0.1442392 | -1.0854177 | 0.2804566  | 0.55646221 |
| phenylacetylglutamine                    | 0.12447519 | 1.08039632 | 0.28267423 | 0.55646221 |
| PE.P.38.4.PE.O.38.5                      | 0.11412076 | 1.07879598 | 0.28338353 | 0.55646221 |
| LPC.22.6                                 | -0.1192407 | -1.0649183 | 0.28958577 | 0.56351826 |
| cotinine                                 | -0.0892225 | -1.0541132 | 0.2944786  | 0.56792301 |
| LPC.22.5                                 | -0.1066787 | -1.0378486 | 0.30194928 | 0.57717739 |
| C5.carnitine                             | -0.1204617 | -1.0298695 | 0.30566066 | 0.57734658 |
| X7.methylxanthine                        | -0.1203289 | -1.0261876 | 0.3073836  | 0.57734658 |
| histidine                                | 0.10773818 | 1.00082301 | 0.31943001 | 0.59389126 |
| Sd18.1.22.1                              | -0.108598  | -0.995882  | 0.32181269 | 0.59389126 |
| cortisol                                 | -0.1175134 | -0.9904605 | 0.3244406  | 0.59389126 |
| PC.34.4                                  | -0.103478  | -0.9743653 | 0.3323256  | 0.60295973 |
| isoleucine                               | -0.1027244 | -0.9598271 | 0.33955499 | 0.60295973 |
| proline                                  | 0.09017489 | 0.95376739 | 0.34259835 | 0.60295973 |
| hydroxyproline                           | 0.12230937 | 0.95104704 | 0.34397031 | 0.60295973 |
| lysine                                   | -0.1039932 | -0.9477849 | 0.34562022 | 0.60295973 |
| C20.4.carnitine                          | 0.10023013 | 0.94143505 | 0.34884648 | 0.60295973 |
| ribothymidine                            | -0.0946853 | -0.9383427 | 0.35042469 | 0.60295973 |
| adenosine                                | -0.1251681 | -0.9357986 | 0.35172651 | 0.60295973 |
| serine                                   | 0.09216425 | 0.92300437 | 0.35832046 | 0.60942692 |



|                             |            |            |            |            |
|-----------------------------|------------|------------|------------|------------|
| sphingosine                 | 0.12372552 | 0.91038513 | 0.36490108 | 0.61044853 |
| PE.P.38.5.PE.O.38.6         | 0.11209848 | 0.90831546 | 0.36598763 | 0.61044853 |
| LPE.16.0                    | 0.10984132 | 0.89859405 | 0.37111867 | 0.61044853 |
| C3.carnitine                | 0.08530714 | 0.89115574 | 0.37507514 | 0.61044853 |
| butyrobetaine               | -0.0865815 | -0.8883809 | 0.37655783 | 0.61044853 |
| C18.2.carnitine             | -0.1142673 | -0.887757  | 0.3768917  | 0.61044853 |
| X4.guanidinobutanoic.acid   | 0.11337544 | 0.88437618 | 0.37870418 | 0.61044853 |
| tyrosine                    | -0.085581  | -0.8701972 | 0.38636474 | 0.61818358 |
| SDMA                        | 0.08567043 | 0.85901419 | 0.39247394 | 0.62334096 |
| C10.2.carnitine             | -0.1020992 | -0.8454802 | 0.39994651 | 0.6305726  |
| PC.P.38.6.PC.O.38.7         | -0.0913825 | -0.8207387 | 0.41382981 | 0.64686416 |
| ectoine                     | 0.12130425 | 0.81524631 | 0.41695063 | 0.64686416 |
| allantoin                   | -0.102442  | -0.8111912 | 0.41926381 | 0.64686416 |
| urocanic.acid               | -0.1081752 | -0.7854602 | 0.43411931 | 0.66503383 |
| N.alpha.acetylgarginine     | 0.06118152 | 0.77177874 | 0.44214238 | 0.66800565 |
| C34.1.DAG.or.TAG.NH4.adduct | -0.0758615 | -0.7716056 | 0.44224448 | 0.66800565 |
| alpha.glycerophosphocholine | 0.11608734 | 0.76389571 | 0.44680402 | 0.67003346 |
| PE.P.40.6.PE.O.40.7         | -0.0800365 | -0.7588696 | 0.44979098 | 0.67003346 |
| LPC.16.0                    | 0.09186628 | 0.75219477 | 0.45377548 | 0.67133906 |
| C8.carnitine                | -0.0939831 | -0.7358159 | 0.46363795 | 0.67809207 |
| X1.methylguanine            | 0.09858147 | 0.7341981  | 0.46461864 | 0.67809207 |
| creatine                    | -0.0705238 | -0.7200237 | 0.47326095 | 0.68200651 |
| glutamate                   | -0.0901319 | -0.7194399 | 0.4736188  | 0.68200651 |
| Cer.d18.1.24.1              | 0.07705367 | 0.71386805 | 0.47704192 | 0.68200651 |
| LPE.18.3                    | 0.08960329 | 0.70918351 | 0.47993051 | 0.68200651 |
| pipecolic.acid              | -0.0961592 | -0.7036381 | 0.48336242 | 0.68239401 |
| C10.carnitine               | -0.0886473 | -0.6858087 | 0.49448768 | 0.69356713 |
| dimethylglycine             | -0.061462  | -0.645835  | 0.51992803 | 0.72454486 |
| X2.methylguanosine          | -0.0799053 | -0.625136  | 0.53336591 | 0.73850665 |
| acetylcholine               | 0.0853802  | 0.60387447 | 0.54735236 | 0.75186043 |
| glycocholate                | 0.06335514 | 0.5999229  | 0.54997198 | 0.75186043 |
| LPE.18.2                    | 0.07271165 | 0.5892131  | 0.55710326 | 0.75409068 |
| LPE.20.1                    | 0.06612461 | 0.57136039 | 0.56909149 | 0.75409068 |
| xanthosine                  | 0.08026385 | 0.57026705 | 0.56982973 | 0.75409068 |
| guanidinoacetic.acid        | 0.06644375 | 0.56717737 | 0.57191841 | 0.75409068 |
| methionine                  | 0.06257316 | 0.56450587 | 0.57372739 | 0.75409068 |
| homoarginine                | -0.0556162 | -0.5639867 | 0.57407926 | 0.75409068 |
| X4.aminohippuric.acid       | -0.0606687 | -0.5610943 | 0.57604149 | 0.75409068 |
| LPC.18.3                    | 0.06541013 | 0.54734084 | 0.58541563 | 0.76174564 |
| C26.carnitine               | -0.0504314 | -0.5344637 | 0.5942572  | 0.7686201  |
| PC.36.2                     | 0.05878152 | 0.52585377 | 0.60020323 | 0.76925236 |
| LPC.14.0                    | -0.0637058 | -0.5234491 | 0.60186875 | 0.76925236 |
| N.acetylmornithine          | 0.05399549 | 0.51301468 | 0.60912034 | 0.77253132 |

|                                       |            |            |            |            |
|---------------------------------------|------------|------------|------------|------------|
| C5.DC.carnitine                       | -0.0456643 | -0.5091802 | 0.61179503 | 0.77253132 |
| hydroxycotinine                       | -0.046041  | -0.5043614 | 0.61516383 | 0.77253132 |
| kynurenic.acid                        | -0.050361  | -0.4847354 | 0.62896898 | 0.77834587 |
| valsartan                             | 0.07274486 | 0.48095411 | 0.63164417 | 0.77834587 |
| Cer.d18.1.16.0                        | -0.0517543 | -0.474313  | 0.6363545  | 0.77834587 |
| ornithine                             | 0.04769144 | 0.47399975 | 0.63657706 | 0.77834587 |
| methylimidazoleacetic.acid            | 0.06228132 | 0.47187761 | 0.63808563 | 0.77834587 |
| N6.N6.dimethyllysine                  | 0.03469818 | 0.45960716 | 0.64683802 | 0.77834587 |
| N.acetylhistidine                     | 0.04305797 | 0.45712419 | 0.64861521 | 0.77834587 |
| homocitrulline                        | 0.05300106 | 0.45711532 | 0.64862156 | 0.77834587 |
| PE.P.36.2.PE.O.36.3                   | 0.04746349 | 0.44291626 | 0.65882339 | 0.78532272 |
| cortisone                             | 0.04925823 | 0.43257862 | 0.66629177 | 0.78532272 |
| leucine                               | -0.0448392 | -0.427606  | 0.66989624 | 0.78532272 |
| X5.acetylamino.6.amino.3.methyluracil | -0.0417746 | -0.4246683 | 0.67202937 | 0.78532272 |
| X2.aminooctanoate                     | -0.0465737 | -0.4238633 | 0.67261436 | 0.78532272 |
| X3.methylhistidine                    | -0.0537015 | -0.4124189 | 0.68095255 | 0.79078361 |
| LPE.20.4                              | 0.04210785 | 0.38146079 | 0.70370488 | 0.81077521 |
| PE.36.2                               | -0.035875  | -0.3759825 | 0.70776003 | 0.81077521 |
| trigonelline                          | -0.0437189 | -0.373732  | 0.70942831 | 0.81077521 |
| gabapentin                            | 0.04518354 | 0.34631096 | 0.72986739 | 0.82556594 |
| vitamin.A                             | 0.03399565 | 0.34135834 | 0.73358035 | 0.82556594 |
| C18.carnitine                         | 0.04211489 | 0.34067119 | 0.734096   | 0.82556594 |
| thiamine                              | 0.04418653 | 0.33592837 | 0.73765845 | 0.82556594 |
| DMGV                                  | -0.0241689 | -0.3148608 | 0.75355109 | 0.83900533 |
| X2.aminoheptanoic.acid                | -0.035378  | -0.2942595 | 0.76919531 | 0.84509795 |
| ADMA                                  | 0.02969387 | 0.2925109  | 0.7705277  | 0.84509795 |
| betaine                               | 0.03036132 | 0.2922053  | 0.77076063 | 0.84509795 |
| LPC.16.1                              | -0.0284268 | -0.2715111 | 0.78658137 | 0.85808877 |
| PE.P.34.2.PE.O.34.3                   | 0.03016    | 0.26582941 | 0.79094101 | 0.85850884 |
| glutamine                             | 0.02319114 | 0.22054375 | 0.82591636 | 0.89198966 |
| N6.methyllysine                       | -0.0135524 | -0.1983676 | 0.84317717 | 0.90610084 |
| tryptophan                            | -0.0186828 | -0.1863875 | 0.85253444 | 0.9086509  |
| C4.carnitine                          | -0.0171018 | -0.1845602 | 0.85396357 | 0.9086509  |
| N.carbamoyl.beta.alanine              | 0.01797747 | 0.17707911 | 0.85981956 | 0.91039718 |
| PC.P.38.5.PC.O.38.6                   | -0.0166056 | -0.1577176 | 0.87501077 | 0.92196257 |
| homocysteine                          | 0.02056582 | 0.13973735 | 0.88916046 | 0.93232359 |
| C9.carnitine                          | -0.0159486 | -0.129694  | 0.89708007 | 0.93608355 |
| PE.38.4                               | 0.00945246 | 0.1222435  | 0.90296188 | 0.93769118 |
| X2.hydroxyhippurate                   | -0.0133732 | -0.1137827 | 0.9096478  | 0.94011447 |
| cyclohexylamine                       | -0.0120444 | -0.108246  | 0.91402662 | 0.94014167 |
| NMMA                                  | -0.0097757 | -0.09982   | 0.92069554 | 0.94251297 |
| putrescine                            | 0.0047479  | 0.04046056 | 0.96781003 | 0.98515156 |
| threonine                             | 0.00406906 | 0.0358595  | 0.97146889 | 0.98515156 |

|                        |            |            |            |            |
|------------------------|------------|------------|------------|------------|
| trimethylamine.N.oxide | -0.0032367 | -0.0246314 | 0.98040009 | 0.98956271 |
| PE.P.34.1.PE.O.34.2    | 0.0014638  | 0.01219346 | 0.99029659 | 0.99490262 |
| X5.methylcytidine      | 0.00043544 | 0.00448954 | 0.9964272  | 0.9964272  |

## tes before and after treatment

| B          | Metabolite              |  |  |
|------------|-------------------------|--|--|
| 3.43537288 | cystine                 |  |  |
| 2.27776651 | hypotaurine             |  |  |
| 1.50763751 | sphinganine             |  |  |
| -0.2647207 | C14.carnitine           |  |  |
| -0.3016067 | PS.P.36.2.PS.O.36.3     |  |  |
| -0.5287925 | inosine                 |  |  |
| -0.537967  | taurine                 |  |  |
| -0.8783534 | thyroxine               |  |  |
| -1.0171626 | myristoleic.acid        |  |  |
| -1.3150365 | X5.hydroxytryptophan    |  |  |
| -1.3396734 | serotonin               |  |  |
| -1.8681234 | glycine                 |  |  |
| -1.8808035 | pro.gly                 |  |  |
| -1.9194195 | niacinamide             |  |  |
| -2.5144285 | pantothenate            |  |  |
| -2.6305029 | Sd18.1.18.0             |  |  |
| -2.7964721 | N.acetylputrescine      |  |  |
| -2.8534929 | LPC.P.16.0.LPC.O.16.1   |  |  |
| -2.8675273 | PS.P.36.1.PS.O.36.2     |  |  |
| -3.0254459 | C2.carnitine            |  |  |
| -3.0822974 | C16.carnitine           |  |  |
| -3.3398983 | hippurate               |  |  |
| -3.4366179 | LPC.20.1                |  |  |
| -3.5633678 | PE.40.6                 |  |  |
| -3.6367282 | X1.methyladenosine      |  |  |
| -3.7493932 | LPC.18.2                |  |  |
| -3.8158542 | caffeine                |  |  |
| -3.8397836 | LPC.18.1                |  |  |
| -3.86028   | X1.methylnicotinamide   |  |  |
| -3.9296713 | C6.carnitine            |  |  |
| -3.9498758 | X7.methylguanaine       |  |  |
| -3.9554112 | xanthine                |  |  |
| -3.9999932 | N2.N2.dimethylguanosine |  |  |
| -4.0657827 | bilirubin               |  |  |
| -4.118207  | N.lauroylglycine        |  |  |
| -4.1233432 | PC.30.0                 |  |  |
| -4.203205  | C7.carnitine            |  |  |
| -4.2201957 | PE.38.6                 |  |  |
| -4.337533  | LPC.20.4                |  |  |
| -4.350184  | LPE.22.6                |  |  |
| -4.3661527 | Sd18.1.18.1             |  |  |

|            |                                    |  |  |
|------------|------------------------------------|--|--|
| -4.4563001 | asparagine                         |  |  |
| -4.4772992 | Sd18.1.14.0                        |  |  |
| -4.5253135 | trimethylbenzene                   |  |  |
| -4.525724  | acetyl.galactosamine               |  |  |
| -4.5342548 | urate                              |  |  |
| -4.5815828 | C4.OH.carnitine                    |  |  |
| -4.714606  | LPE.18.0                           |  |  |
| -4.7274126 | LPC.P.18.0.LPC.O.18.1              |  |  |
| -4.7464581 | Sd18.1.16.1                        |  |  |
| -4.7464728 | biliverdin                         |  |  |
| -4.8373739 | N.acetylalanine                    |  |  |
| -4.8571203 | N1.methyl.2.pyridone.5.carboxamide |  |  |
| -4.9700035 | pseudouridine                      |  |  |
| -5.0226883 | cinnamoylglycine                   |  |  |
| -5.0772253 | LPE.18.1                           |  |  |
| -5.1119654 | N.methylproline                    |  |  |
| -5.1153523 | C18.1.carnitine                    |  |  |
| -5.116569  | choline                            |  |  |
| -5.13886   | methionine.sulfoxide               |  |  |
| -5.2077529 | C14.1.carnitine                    |  |  |
| -5.2807641 | cytosine                           |  |  |
| -5.310801  | Sd18.1.22.0                        |  |  |
| -5.3190233 | LPC.20.3                           |  |  |
| -5.3223721 | arginine                           |  |  |
| -5.3226921 | acisoga                            |  |  |
| -5.3910821 | N4.acetylcytidine                  |  |  |
| -5.4249505 | LPC.20.5                           |  |  |
| -5.441893  | Sd18.1.20.0                        |  |  |
| -5.4512633 | LPC.18.0                           |  |  |
| -5.4532699 | PE.34.0                            |  |  |
| -5.4752883 | LPE.20.0                           |  |  |
| -5.5230242 | GABA                               |  |  |
| -5.5342418 | alanine                            |  |  |
| -5.5355929 | PE.P.38.6.PE.O.38.7                |  |  |
| -5.5553586 | PC.P.34.2.PC.O.34.3                |  |  |
| -5.6002346 | citrulline                         |  |  |
| -5.6284139 | piperine                           |  |  |
| -5.6306618 | C3.DC.CH3.carnitine                |  |  |
| -5.6347163 | X4.acetamidobutanoate              |  |  |
| -5.6351733 | PC.32.2                            |  |  |
| -5.6430653 | X1.methylguanosine                 |  |  |
| -5.7042143 | C12.carnitine                      |  |  |
| -5.7260718 | N.acetylaspartic.acid              |  |  |

|            |                                          |  |  |
|------------|------------------------------------------|--|--|
| -5.7441034 | PC.P.36.4.PC.O.36.5                      |  |  |
| -5.7665725 | X3.methylxanthine                        |  |  |
| -5.7741809 | X1.7.dimethyluric.acid                   |  |  |
| -5.7903956 | PE.34.2                                  |  |  |
| -5.8146316 | C5.1.carnitine                           |  |  |
| -5.8301913 | X2.aminoisobutyric.acid                  |  |  |
| -5.8389052 | N6.acetyllysine                          |  |  |
| -5.8429198 | C12.1.carnitine                          |  |  |
| -5.8463552 | X1.methylhistamine                       |  |  |
| -5.8501629 | diacetylspermine                         |  |  |
| -5.9130907 | N1.acetylspermidine                      |  |  |
| -5.9394837 | PE.P.36.4.PE.O.36.5                      |  |  |
| -5.9697596 | carnitine                                |  |  |
| -5.9740448 | N6.N6.N6.trimethyllysine                 |  |  |
| -6.0223113 | creatinine.y                             |  |  |
| -6.0241727 | linoleoyl.ethanolamide                   |  |  |
| -6.0326294 | valine                                   |  |  |
| -6.0360212 | proline.betaine                          |  |  |
| -6.0396836 | Sd18.1.16.0                              |  |  |
| -6.0829404 | PC.34.3                                  |  |  |
| -6.0973318 | phenylalanine                            |  |  |
| -6.1014893 | PE.36.4                                  |  |  |
| -6.117244  | glycodeoxycholate.glycochenodeoxycholate |  |  |
| -6.1435883 | C14.2.carnitine                          |  |  |
| -6.148939  | phenylacetylglutamine                    |  |  |
| -6.1506392 | PE.P.38.4.PE.O.38.5                      |  |  |
| -6.1652798 | LPC.22.6                                 |  |  |
| -6.1765506 | cotinine                                 |  |  |
| -6.1933048 | LPC.22.5                                 |  |  |
| -6.2014308 | C5.carnitine                             |  |  |
| -6.2051599 | X7.methylxanthine                        |  |  |
| -6.2304942 | histidine                                |  |  |
| -6.2353571 | Sd18.1.22.1                              |  |  |
| -6.2406658 | cortisol                                 |  |  |
| -6.2562588 | PC.34.4                                  |  |  |
| -6.270128  | isoleucine                               |  |  |
| -6.2758486 | proline                                  |  |  |
| -6.2784051 | hydroxyproline                           |  |  |
| -6.2814613 | lysine                                   |  |  |
| -6.2873809 | C20.4.carnitine                          |  |  |
| -6.2902495 | ribothymidine                            |  |  |
| -6.2926026 | adenosine                                |  |  |
| -6.3043412 | serine                                   |  |  |

|            |                             |  |  |
|------------|-----------------------------|--|--|
| -6.3157638 | sphingosine                 |  |  |
| -6.3176224 | PE.P.38.5.PE.O.38.6         |  |  |
| -6.3262971 | LPE.16.0                    |  |  |
| -6.3328725 | C3.carnitine                |  |  |
| -6.3353116 | butyrobetaine               |  |  |
| -6.335859  | C18.2.carnitine             |  |  |
| -6.3388187 | X4.guanidinobutanoic.acid   |  |  |
| -6.3511105 | tyrosine                    |  |  |
| -6.3606672 | SDMA                        |  |  |
| -6.3720701 | C10.2.carnitine             |  |  |
| -6.3924546 | PC.P.38.6.PC.O.38.7         |  |  |
| -6.3968988 | ectoine                     |  |  |
| -6.4001612 | allantoin                   |  |  |
| -6.4204879 | urocanic.acid               |  |  |
| -6.4310325 | N.alpha.acetylarginine      |  |  |
| -6.4311648 | C34.1.DAG.or.TAG.NH4.adduct |  |  |
| -6.437025  | alpha.glycerophosphocholine |  |  |
| -6.4408141 | PE.P.40.6.PE.O.40.7         |  |  |
| -6.4458078 | LPC.16.0                    |  |  |
| -6.4578769 | C8.carnitine                |  |  |
| -6.4590547 | X1.methylguanine            |  |  |
| -6.4692649 | creatine                    |  |  |
| -6.4696812 | glutamate                   |  |  |
| -6.4736376 | Cer.d18.1.24.1              |  |  |
| -6.4769404 | LPE.18.3                    |  |  |
| -6.4808224 | pipecolic.acid              |  |  |
| -6.4930992 | C10.carnitine               |  |  |
| -6.5194897 | dimethylglycine             |  |  |
| -6.5325379 | X2.methylguanosine          |  |  |
| -6.5455019 | acetylcholine               |  |  |
| -6.5478622 | glycocholate                |  |  |
| -6.5541821 | LPE.18.2                    |  |  |
| -6.5644659 | LPE.20.1                    |  |  |
| -6.5650855 | xanthosine                  |  |  |
| -6.56683   | guanidinoacetic.acid        |  |  |
| -6.5683308 | methionine                  |  |  |
| -6.5686217 | homoarginine                |  |  |
| -6.5702372 | X4.aminohippuric.acid       |  |  |
| -6.577806  | LPC.18.3                    |  |  |
| -6.5847235 | C26.carnitine               |  |  |
| -6.5892573 | PC.36.2                     |  |  |
| -6.5905104 | LPC.14.0                    |  |  |
| -6.5958821 | N.acetylornithine           |  |  |

|            |                                       |  |  |
|------------|---------------------------------------|--|--|
| -6.5978291 | C5.DC.carnitine                       |  |  |
| -6.6002552 | hydroxycotinine                       |  |  |
| -6.6098995 | kynurenic.acid                        |  |  |
| -6.6117138 | valsartan                             |  |  |
| -6.6148662 | Cer.d18.1.16.0                        |  |  |
| -6.6150138 | ornithine                             |  |  |
| -6.6160113 | methylimidazoleacetic.acid            |  |  |
| -6.6216914 | N6.N6.dimethyllysine                  |  |  |
| -6.6228227 | N.acetylhistidine                     |  |  |
| -6.6228267 | homocitrulline                        |  |  |
| -6.6291786 | PE.P.36.2.PE.O.36.3                   |  |  |
| -6.6336776 | cortisone                             |  |  |
| -6.635804  | leucine                               |  |  |
| -6.6370487 | X5.acetylamino.6.amino.3.methyluracil |  |  |
| -6.6373883 | X2.aminooctanoate                     |  |  |
| -6.6421467 | X3.methylhistidine                    |  |  |
| -6.6543682 | LPE.20.4                              |  |  |
| -6.6564319 | PE.36.2                               |  |  |
| -6.6572711 | trigonelline                          |  |  |
| -6.6670923 | gabapentin                            |  |  |
| -6.6687866 | vitamin.A                             |  |  |
| -6.6690197 | C18.carnitine                         |  |  |
| -6.6706162 | thiamine                              |  |  |
| -6.6774378 | DMGV                                  |  |  |
| -6.6836821 | X2.aminoheptanoic.acid                |  |  |
| -6.6841927 | ADMA                                  |  |  |
| -6.6842817 | betaine                               |  |  |
| -6.6900875 | LPC.16.1                              |  |  |
| -6.691607  | PE.P.34.2.PE.O.34.3                   |  |  |
| -6.7025711 | glutamine                             |  |  |
| -6.7071962 | N6.methyllysine                       |  |  |
| -6.7094913 | tryptophan                            |  |  |
| -6.7098288 | C4.carnitine                          |  |  |
| -6.7111759 | N.carbamoyl.beta.alanine              |  |  |
| -6.7144037 | PC.P.38.5.PC.O.38.6                   |  |  |
| -6.7170671 | homocysteine                          |  |  |
| -6.7184147 | C9.carnitine                          |  |  |
| -6.7193495 | PE.38.4                               |  |  |
| -6.7203441 | X2.hydroxyhippurate                   |  |  |
| -6.7209563 | cyclohexylamine                       |  |  |
| -6.7218295 | NMMA                                  |  |  |
| -6.7259769 | putrescine                            |  |  |
| -6.7261518 | threonine                             |  |  |



|            |                        |  |  |
|------------|------------------------|--|--|
| -6.7264901 | trimethylamine.N.oxide |  |  |
| -6.7267182 | PE.P.34.1.PE.O.34.2    |  |  |
| -6.7267823 | X5.methylcytidine      |  |  |
